# Supplementary material for: Sustainable biotransformation of microalgae via probiotic fermentation for enhanced functional, nutritional, and sensory properties
Source: Royal Society of Chemistry journal article supplement (doi:10.1039/d5fb00492f), 2025-11-07
Supplement: d5fb00492f1.pdf [file d5fb00492f1.pdf]

## Supporting Information

### **Sustainable biotransformation of microalgae *via* probiotic fermentation for enhanced functional, nutritional, and sensory properties**

Po-Hsiang Wang<sup>†,\*</sup>, Zann Yi Qi Tan<sup>†</sup>, Choy Eng Nge, Nurhidayah Basri, Lina Xian Yu Lee, Aaron Thong, Mario Wibowo, Elaine Jinfeng Chin, Sharon Crasta, Geraldine Chan, Yoganathan Kanagasundaram, and Siew Bee Ng<sup>\*</sup>

Singapore Institute of Food and Biotechnology Innovation (SIFBI), Agency for Science, Technology and Research (A\*STAR), 31 Biopolis Way, Nanos, Singapore 138669, Singapore.

<sup>\*</sup>Authors to whom correspondence should be addressed.

Po-Hsiang Wang, Email: [tommy\\_wang@a-star.edu.sg](mailto:tommy_wang@a-star.edu.sg)

Siew Bee Ng, Email: [ngsb@a-star.edu.sg](mailto:ngsb@a-star.edu.sg)

<sup>†</sup> These authors contributed equally to this work.

## 36 **Supporting Methods**

## 37 **Supporting Data**

## 38 **Supporting Tables**

39 Table S1. Enzymatic activity profiles of 22 selected bacterial strains.

40 Table S2. Dry biomass yield (%w/v) and percentage change (%) of unfermented and fermented  
41 microalgae biomass over 72 hours.

42 Table S3. List of aromatic compounds detected in unfermented microalgae and *L. plantarum*-  
43 fermented microalgae over the course of fermentation.

44 Table S4. ASTREE E-tongue sensor summary with food applications.

45 Table S5. Metabolite profile of umami-related compounds detected during *L. plantarum*-mediated  
46 biotransformation of microalgae.

47 Table S6. Metabolite profile of amino acids and their bioconversion products during *L. plantarum*-  
48 mediated biotransformation of microalgae.

49 Table S7. Demographic and lifestyle information of the sniff test panelists (n = 10).

50 Table S8. Two-way ANOVA statistics for grassy odour intensity.

51 Table S9. Statistical summary of pairwise comparison for grassy aroma intensity between  
52 unfermented and in *L. plantarum*-fermented microalgae.

53 Table S10. Two-way ANOVA statistics for sour odour intensity.

54 Table S11. Statistical summary of pairwise comparison for sour odour intensity between  
55 unfermented and in *L. plantarum*-fermented microalgae.

56 Table S12. Two-way ANOVA statistics for fishy odour intensity.

57 Table S13. Statistical summary of pairwise comparison for fishy odour intensity between  
58 unfermented and in *L. plantarum*-fermented microalgae.

59 Table S14. Two-way ANOVA statistics for earthy odour intensity.

60 Table S15. Statistical summary of pairwise comparison for earthy odour intensity between  
61 unfermented and in *L. plantarum*-fermented microalgae.

62

## 63 **Supporting Figures**

64 Figure S1. LC-MS/MS fragmentation spectra at collision-induced dissociation (CID)10V of  
65 aromatic lactic acid derivatives in *L. plantarum*-fermented microalgae.

66 Figure S2. Extracted ion chromatograms (EICs) from LC-MS showing the bioconversion of  
67 precursor amino acids during *L. plantarum*-mediated fermentation of microalgae (MA) over  
68 96 hours.

69 Figure S3. Olfactory evaluation of microalgae fermented with *L. plantarum*.

70

## 71 **Appendix**

### 72 **Supporting Methods**

73 Unless specified otherwise, chemicals and reagents are purchased from Sigma-Aldrich (St.  
74 Louis, MO, USA).

75

#### 76 ***Bacterial strains cultivation***

77 Non-lactic acid bacteria (non-LAB) strains—including *Bacillus* spp., *Cupriavidus necator*,  
78 *Microbacterium imperiale*, *Weizmannia coagulans*, and *Priestia megaterium*—were cultured  
79 in Luria-Bertani (LB) broth at 37 °C with agitation at 200 rpm until mid-logarithmic phase  
80 ( $OD_{600} \approx 0.4$ ). Lactic acid bacteria (LAB) strains were cultivated in De Man, Rogosa, and  
81 Sharpe (MRS) broth under identical conditions (37 °C, 200 rpm) until  $OD_{600} \approx 0.4$ .  
82 *Streptococcus thermophilus* was cultured separately in M17 broth (Difco™, Becton, Dickinson  
83 and Company, Sparks, MD, USA) at 42 °C, 200 rpm till a similar growth phase.

84

#### 85 ***Protease assay***

86 The proteolytic activity of the bacterial strains was qualitatively evaluated using the skim milk  
87 agar assay method. Skim milk agar was prepared with the following composition: 28 g/L skim  
88 milk powder, 5 g/L casein, 2.5 g/L yeast extract, 1 g/L dextrose, and 15 g/L agar in 1 L of  
89 distilled water, adjusted to a final pH of  $7.0 \pm 0.2$  at 25 °C. 10  $\mu$ L aliquot of the bacteria culture

90 supernatant was aseptically spotted onto the surface of the agar and incubated at 37 °C.  
91 Proteolytic activity, as indicated by a zone of clearance around the inoculation site, was  
92 monitored across 96 hours.

93

#### 94 *Lipase assay*

95 The lipolytic activity of the bacterial strains was qualitatively assessed using the tributyrin agar  
96 assay method. Tributyrin agar was prepared by dissolving 20 g of tributyrin agar powder in 1  
97 L of distilled water, followed by adding 10 mL of glyceryl tributyrate upon cooling to 80 °C  
98 after autoclaving. 10 µL of the bacterial culture supernatant was spotted on the tributyrin agar  
99 and incubated at 37 °C. Lipolytic activity, as indicated by a zone of clearance around the  
100 inoculation site, was monitored across 96 hours.

101

#### 102 *β-glucosidase assay*

103 β-glucosidase activity of the bacterial strains was assessed by quantifying the hydrolysis of *p*-  
104 nitrophenyl-β-D-glucopyranoside (pNPG). Bacterial culture supernatants were obtained by  
105 centrifugation at 4,000 × *g* for 20 minutes at 4 °C. For each sample, 0.5 mL of the culture  
106 supernatant was mixed with 2 mL of 1 mM pNPG solution and incubated at 45 °C for 30  
107 minutes. The reaction was terminated by the addition of 2.5 mL of 1 M sodium carbonate. The  
108 release of *p*-nitrophenol was quantified by measuring absorbance at 400 nm using a  
109 spectrophotometer. β-glucosidase activity was calculated based on a standard calibration curve  
110 constructed using a commercial β-glucosidase enzyme, and all reactions were performed in  
111 triplicates.

## 112 ***Cellulase assay***

113 Cellulolytic activity of the bacterial strains was qualitatively determined using the  
114 carboxymethyl cellulose (CMC) agar assay method. 0.2% CMC agar was prepared based on  
115 the following composition: CMC 2 g, sodium nitrate (NaNO<sub>3</sub>) 20 mL, dipotassium hydrogen  
116 phosphate (K<sub>2</sub>HPO<sub>4</sub>) 1 g, potassium chloride (KCl) 1 g, magnesium sulfate (MgSO<sub>4</sub>) 0.5 g,  
117 yeast extract 0.5 g, agar 15 g, 1 L distilled water. 10 µL of the culture supernatant was spotted  
118 on the 0.2% CMC agar and incubated at 37 °C. Cellulolytic activity, as indicated by a zone of  
119 clearance around the inoculation site, was monitored across 96 hours.

120

## 121 ***Submerged fermentation of microalgae***

122 Lyophilized *C. vulgaris* powder was reconstituted in 50 mL of sterile deionized water to a final  
123 solids content of 5 % (w/v). The suspension was autoclaved at 121 °C for 15 min, cooled to  
124 room temperature, and inoculated with *Lactiplantibacillus plantarum* at an initial density of  
125 10<sup>6</sup> CFU/g. Fermentation was carried out in 250 mL baffled Erlenmeyer flasks containing 50  
126 mL working volume, leaving adequate headspace for gas exchange. Submerged fermentation  
127 was conducted at 37 °C in a thermostatically controlled shaker incubator at 200 rpm for 96 h  
128 under dark, aerobic conditions. No external aeration or gas flushing was applied. As the  
129 microalgae biomass was non-viable, illumination was omitted, and no photosynthetic activity  
130 was expected. Uninoculated *C. vulgaris* biomass flasks served as controls and were processed  
131 identically. Samples were collected at 0, 24, 48, 72 h and 96 h for subsequent biochemical and  
132 sensory analyses. Harvested samples were immediately frozen at -80 °C and freeze-dried for 7  
133 days. The dried fermentates were then ground into a fine powder using a sterile blender and  
134 stored at -20 °C until further analysis.

135 ***Biomass yield and percentage change over time***

136 To determine the percentage dry yield of the biomass (% weight/volume), 0.5 mL of each  
137 sample of unfermented and fermented microalgae suspensions were pipetted into pre-weighed  
138 5 mL tubes for each sample. The samples were frozen overnight in -80 °C freezer, followed by  
139 freeze-drying until fully dried. After drying, the tubes were weighed again to obtain the weight  
140 of the dry biomass. Data were analysed using GraphPad Prism version 8.0, and the percentage  
141 dry yield of the biomass (% weight/volume) and the percentage change in biomass (%) were  
142 calculated using the following formulae:

143  $\text{Dry Yield (\%w/v)} = (\text{Weight of dry biomass (g)} / \text{Volume of wet sample (mL)}) \times 100$

144  $\text{Percentage Change in Biomass (\%)} = [(\text{Fermented biomass} - \text{Unfermented biomass}) /$   
145  $(\text{Unfermented biomass})] \times 100$

146

147 ***In-house olfactory evaluations***

148 An in-house, untrained olfactory panel (n = 10) was recruited to perform time-course olfactory  
149 evaluations on microalgae fermentates inoculated with selected bacterial strains. Panelists  
150 assessed samples at various fermentation timepoints under blinded conditions, with all samples  
151 coded to eliminate bias. Aroma profiling focused on four key sensory attributes: grassy, sour,  
152 fishy, and earthy. Perceived odour intensity was rated using a structured 3-point scale, where  
153 1 = *very weak*, 2 = *moderate*, and 3 = *very strong*. All evaluations were conducted  
154 anonymously. Panellists also completed a demographic and lifestyle questionnaire, which  
155 captured data on age, gender, ethnicity, dietary habits, smoking status, and self-rated smell  
156 sensitivity (on a 5-point scale, where 1 = *very poor* and 5 = *very strong*) (**Table S7**). Prior to

157 participation, all individuals were briefed on the study objectives and procedures and provided  
158 written informed consent.

159

#### 160 *Electronic tongue (E-tongue) analysis*

161 The taste and flavour evolution of the fermented microalgae samples was analysed using the  
162 ASTREE E-tongue system (Alpha MOS, Toulouse, France), a sensor-based technology  
163 designed to mimic human taste perception. The system employs seven potentiometric sensors  
164 (AHS, ANS, CPS, CTS, NMS, PKS, SCS) alongside an Ag/AgCl reference electrode, enabling  
165 the detection of key taste modalities such as bitterness, sweetness, umami, sourness, and  
166 saltiness, thereby generating a comprehensive taste fingerprint of each sample. E-tongue  
167 analysis was conducted following this protocol<sup>1</sup>. Briefly, 300 mg of freeze-dried fermentate  
168 was weighed into a 50 mL Falcon tube and reconstituted with 30 mL of sterile water. The  
169 mixture was vortexed and shaken on a rotary shaker for 30 minutes at room temperature,  
170 followed by centrifugation at  $4000 \times g$  for 30 minutes to obtain the supernatant. Between each  
171 sample run, the sensors and reference electrode were rinsed with water for 10 seconds to  
172 prevent cross-sample interference. Each sample was analysed for 120 seconds, with  
173 measurements repeated nine times to ensure system stability. The sensor signal at the 120th  
174 second was extracted from the last six measurements and averaged to generate the final raw  
175 data. Principal component analysis (PCA) was conducted using R software, and biplots were  
176 generated to visualize sample clustering and taste profile evolution during fermentation.

177

#### 178 *Headspace Solid Phase Micro Extraction (HS-SPME) GC-MS Analysis*

179 Headspace solid-phase microextraction (HS-SPME) was conducted using a 23-gauge, 50/30  
180  $\mu\text{m}$  DVB/CAR/PDMS fibre (Supelco, USA). A volume of 500  $\mu\text{L}$  of the wet sample was  
181 transferred into a 20 mL headspace vial and spiked with 100  $\mu\text{L}$  of an internal standard solution  
182 (2,3-dimethoxytoluene at 10 ppm). The sample was incubated at 80 °C for 10 minutes, after  
183 which the SPME fibre was exposed to the headspace for 30 minutes while agitated at 250 rpm.  
184 Volatile compounds were then thermally desorbed from the fibre in the gas chromatograph  
185 (GC) injector at 250 °C for 600 seconds. Subsequent GC-MS analysis was performed using an  
186 Agilent 7890B GC system coupled with a 5977B mass spectrometer and equipped with a  
187 multimode inlet (Agilent Technologies, USA). Separation was achieved on a polar J&W DB-  
188 Wax Ultra Inert capillary column (30 m  $\times$  0.25 mm I.D., 0.25  $\mu\text{m}$  film thickness; Agilent  
189 Technologies). The injection was operated in split/splitless mode, with split ratios of 1:10. The  
190 oven temperature was initially set to 35 °C, then ramped at 100 °C/min to 60 °C, followed by  
191 8 °C/min to 190 °C, and finally increased at 20 °C/min to 250 °C, where it was held for 6.5  
192 minutes. Helium was used as the carrier gas at a constant flow of 1.0 mL/min. The mass  
193 spectrometer operated in electron ionization mode at 70 eV, with source and transfer line  
194 temperatures of 230 °C and 250 °C, respectively, and data was collected in full scan mode over  
195 the  $m/z$  range 35–450.

196

#### 197 **Untargeted metabolite analysis by LC-MS**

198 Freeze-dried biomass (100 mg) was extracted with 20 mL of 50% aqueous MeOH. The mixture  
199 was vortexed briefly and sonicated for 10 min at room temperature. After sonication, the  
200 samples were centrifuged at 14,000 rpm for 5 min to separate the supernatant and solid  
201 biomass. The supernatant was transferred into LCMS glass vial for LCMS analysis (injection

202 volume: 5 uL). Supernatant which exhibited turbidity were further filtered using 0.45 µm  
203 Claristep hydrophilic filter (Sartorius, Goettingen, Germany) prior to LCMS analysis.

204 HPLC-MS analyses were conducted using Agilent UHPLC 1290 Infinity coupled to Agilent  
205 6540 accurate-mass quadrupole time-of-flight (QTOF) mass spectrometer and an ESI source.  
206 Gradient elution that starts from 98% water with 0.1% formic acid to 100% acetonitrile in 0.1%  
207 formic acid over 8.6 min along with an Acquity UPLC BEH C18 (2.1 × 50 mm, 1.7 µm) column  
208 at a flow rate of 0.5 mL/min was used. The operating parameters for QTOF were the same as  
209 previously reported<sup>2</sup>.

210 The HRMS data were processed and analyzed using Agilent MassHunter Qualitative Analysis  
211 version 10.0 software; The untargeted metabolites analysis and annotation was performed  
212 using MZmine 3.9.0<sup>3</sup>; Compounds annotation in MZmine was performed by matching  
213 experimental MS/MS spectra against library MS/MS spectra. The actual identity of indole  
214 lactic acid, phenyl lactic acid, and hydroxyphenyl lactic acid was validated by comparing  
215 MS/MS spectra and retention time with analytical standards. Metaboanalyst 6.0 was used for  
216 heatmap data visualization<sup>4</sup>.

217

## 218 **Statistical analysis**

219 Olfactory evaluation data were analysed using GraphPad Prism version 8.0. For each aroma  
220 attribute, mean intensity scores were subjected to two-way repeated measures ANOVA, with  
221 treatment (unfermented vs. *Lactiplantibacillus plantarum*-fermented) and fermentation time-  
222 point (0, 24, 48, 72 and 96 hours) specified as within-subject factors. Panellist variation was  
223 included as a blocking factor to account for individual differences. The assumption of

sphericity was not made, and Geisser-Greenhouse correction was applied where necessary.

Statistical significance was determined at an alpha level of 0.05.

## Figures preparation

BioRender (BioRender.com) was used to generate schematic figures for visualising experimental workflows and processes.

## Supporting Data

## Supporting Tables

**Table S1. Enzymatic Activity Profiles of 22 Selected Bacterial Strains**

| Strains                           | Protease Activity | Lipase Activity | Cellulase Activity | β-Glucosidase Activity (mU/mL) |
|-----------------------------------|-------------------|-----------------|--------------------|--------------------------------|
| <i>Cupriavidus necator</i>        | -                 | +               | +                  | 0.05                           |
| <i>Microbacterium imperiale</i>   | -                 | -               | +                  | 0                              |
| <i>Bacillus pumilus</i>           | +++               | ++              | -                  | 0                              |
| <i>Bacillus subtilis</i>          | ++                | ++              | +++                | 0.07                           |
| <i>Bacillus amyloliquefaciens</i> | ++                | +++             | ++                 | 0.73                           |
| <i>Bacillus licheniformis</i>     | +                 | ++              | ++                 | 0.14                           |
| <i>Weizmannia coagulans</i>       | -                 | +++             | -                  | 0.14                           |
| <i>Priestia megaterium</i>        | +++               | ++              | +                  | 0                              |

|                                                 |     |   |   |      |
|-------------------------------------------------|-----|---|---|------|
| <i>Lacticaseibacillus paracasei</i>             | +++ | - | - | 0.40 |
| <i>Lacticaseibacillus paracasei</i> ATCC 11578  | ++  | - | - | 0    |
| <i>Lactiplantibacillus plantarum</i>            | -   | - | - | 0    |
| <i>Lactiplantibacillus plantarum</i>            | -   | + | + | 0.48 |
| <i>Lactiplantibacillus plantarum</i> ATCC 14917 | +++ | - | - | 0    |
| <i>Lacticaseibacillus rhamnosus</i>             | ++  | - | - | 0.54 |
| <i>Limosilacobacillus fermentum</i>             | ++  | - | - | 0    |
| <i>Streptococcus thermophilus</i>               | ++  | - | - | 0    |
| <i>Liquorilactobacillus nagelii</i>             | ++  | - | - | 0    |
| <i>Ligilactobacillus salivarius</i>             | ++  | - | - | 0    |
| <i>Pediococcus pentosaceus</i>                  | ++  | - | - | 0.22 |
| <i>Pediococcus pentosaceus</i>                  | ++  | - | - | 0    |
| <i>Leuconostoc mesenteroides</i>                | ++  | - | - | 0    |
| <i>Leuconostoc citreum</i>                      | ++  | - | - | 0    |

233 Agar assays were used to assess protease, lipase, and cellulase activity and are scored  
234 qualitatively. Symbols represent relative activity levels: – (no activity), + (low), ++ (moderate),  
235 +++ (high).  $\beta$ -glucosidase activity was quantified from culture supernatants and expressed in

236 milliunits per milliliter (mU/mL). Strains exhibiting  $\geq$  **0.20mU/mL** of  $\beta$ -glucosidase activity  
237 are classified as positive (values highlighted in red).

238 **Table S2: Dry biomass yield (%w/v) and percentage change (%) of unfermented and fermented microalgae biomass over 72 hours**

| Sample                              | Dry Yield (% w/v) |             |             | Mean<br>(n =3) | Standard<br>deviation | Percentage change in fermented biomass<br>(relative to unfermented controls) |             |             | Mean<br>(n=3) | Standard<br>deviation |
|-------------------------------------|-------------------|-------------|-------------|----------------|-----------------------|------------------------------------------------------------------------------|-------------|-------------|---------------|-----------------------|
|                                     | Replicate 1       | Replicate 2 | Replicate 3 |                |                       | Replicate 1                                                                  | Replicate 2 | Replicate 3 |               |                       |
| Microalgae_0h (unfermented)         | 9.18              | 9.22        | 8.7         | 9.03           | 0.29                  | -                                                                            | -           | -           | -             | -                     |
| Microalgae_24h (unfermented)        | 8.92              | 9.16        | 9.24        | 9.11           | 0.17                  | -                                                                            | -           | -           | -             | -                     |
| Microalgae_48h (unfermented)        | 9.14              | 8.94        | 9.26        | 9.11           | 0.16                  | -                                                                            | -           | -           | -             | -                     |
| Microalgae_72h (unfermented)        | 9.4               | 9.1         | 9.08        | 9.19           | 0.18                  | -                                                                            | -           | -           | -             | -                     |
| <i>B. amyloliquefaciens</i> _MA_0h  | 9.2               | 9.26        | 8.72        | 9.06           | 0.30                  | 0.22                                                                         | 0.43        | 0.23        | 0.29          | 0.12                  |
| <i>B. amyloliquefaciens</i> _MA_24h | 7.94              | 8.16        | 8.16        | 8.09           | 0.13                  | -10.99                                                                       | -10.92      | -11.69      | -11.20        | 0.43                  |
| <i>B. amyloliquefaciens</i> _MA_48h | 8.38              | 7.72        | 8.26        | 8.12           | 0.35                  | -8.32                                                                        | -13.65      | -10.80      | -10.92        | 2.67                  |
| <i>B. amyloliquefaciens</i> _MA_72h | 6.22              | 5.46        | 6.04        | 5.91           | 0.40                  | -33.83                                                                       | -40.00      | -33.48      | -35.77        | 3.67                  |
| <i>B. subtilis</i> _MA_0h           | 9.2               | 9.24        | 8.7         | 9.05           | 0.30                  | 0.22                                                                         | 0.22        | 0.00        | 0.14          | 0.13                  |
| <i>B. subtilis</i> _MA_24h          | 8.18              | 8.32        | 8.14        | 8.21           | 0.09                  | -8.30                                                                        | -9.17       | -11.90      | -9.79         | 1.88                  |
| <i>B. subtilis</i> _MA_48h          | 7.94              | 7.68        | 7.76        | 7.79           | 0.13                  | -13.13                                                                       | -14.09      | -16.20      | -14.47        | 1.57                  |
| <i>B. subtilis</i> _MA_72h          | 7.7               | 7.42        | 7.14        | 7.42           | 0.28                  | -18.09                                                                       | -18.46      | -21.37      | -19.30        | 1.80                  |
| <i>L. plantarum</i> _MA_0h          | 9.18              | 9.26        | 8.8         | 9.08           | 0.25                  | 0.00                                                                         | 0.43        | 1.15        | 0.53          | 0.58                  |

|                             |      |      |      |      |      |      |      |      |      |      |
|-----------------------------|------|------|------|------|------|------|------|------|------|------|
| <i>L. plantarum</i> _MA_24h | 9.2  | 9.46 | 8.98 | 9.21 | 0.24 | 3.14 | 3.28 | 3.22 | 3.21 | 0.07 |
| <i>L. plantarum</i> _MA_48h | 9.46 | 9.28 | 9.6  | 9.45 | 0.16 | 3.50 | 3.80 | 3.90 | 3.73 | 0.21 |
| <i>L. plantarum</i> _MA_72h | 9.82 | 9.5  | 9.68 | 9.67 | 0.16 | 4.47 | 4.40 | 4.54 | 4.47 | 0.07 |

239 Dry biomass yield (% w/v) and percentage change in microalgae biomass (%) during 72-hour fermentation with selected microbial strains. *B.*  
240 *amyloliquefaciens*, *B. subtilis*, *L. plantarum* are labelled as “*B. amyloliquefaciens*\_MA”, “*B. subtilis*\_MA” and “*L. plantarum*\_MA” respectively;  
241 unfermented samples are labelled as Microalgae. Fermentation timepoints are expressed as 0h, 24h, 48h, and 72h, corresponding to 0, 24, 48, and  
242 72 hours of fermentation, respectively. Dry biomass yield was quantified as dry weight (% w/v) and percentage change was calculated relative to  
243 unfermented controls at corresponding time points. Data represent mean  $\pm$  standard deviation (n = 3 biological replicates). Notably, biomass  
244 decreased progressively during *Bacillus spp.* fermentations, with *B. amyloliquefaciens* showing the highest reduction (~36% at 72 h), while *L.*  
245 *plantarum* showed a modest increase in biomass over time (~+5%).

246 **Table S3: List of volatiles detected in unfermented microalgae and *L. plantarum*-fermented microalgae throughout fermentation**

|    |                |          |                                               |                      |                      |                |                                  | Microalgae only (unfermented) |             |             |             |             | <i>L. plantarum</i> -fermented microalgae |             |             |             |     |
|----|----------------|----------|-----------------------------------------------|----------------------|----------------------|----------------|----------------------------------|-------------------------------|-------------|-------------|-------------|-------------|-------------------------------------------|-------------|-------------|-------------|-----|
| No | Name           | CAS No   | Formula                                       | Retention Time (min) | Retention Index (RI) | Compound class | Odour Description                | 0h                            | 24h         | 48h         | 72h         | 96h         | 0h                                        | 24h         | 48h         | 72h         | 96h |
| 1  | Acetic acid    | 64-19-7  | C <sub>2</sub> H <sub>4</sub> O <sub>2</sub>  | 11.2                 | 1462                 | Acid           | Sharp, sour, vinegar             | 0.000373829                   | 5.59499E-05 | 0.000102105 | 7.71635E-05 | 0.000117517 | 8.44834E-05                               | 0.000230327 | 2.85498E-05 | 1.42339E-05 | 0   |
| 2  | Butanoic acid  | 107-92-6 | C <sub>4</sub> H <sub>8</sub> O <sub>2</sub>  | 13.9                 | 1640                 | Acid           | Sharp, acetic, cheese, dairy     | 0.000224656                   | 7.06529E-05 | 8.0395E-05  | 0.000100432 | 9.52012E-05 | 7.0737E-05                                | 0.0002923   | 0           | 0           | 0   |
| 3  | Hexanoic acid  | 142-62-1 | C <sub>6</sub> H <sub>12</sub> O <sub>2</sub> | 17.0                 | 1860                 | Acid           | Sour, fatty, sweaty, cheesy      | 1.72991E-05                   | 1.32659E-05 | 2.2313E-05  | 1.95154E-05 | 2.3045E-05  | 2.02186E-05                               | 2.65836E-05 | 4.02418E-06 | 5.36998E-06 | 0   |
| 4  | Octanoic acid  | 124-07-2 | C <sub>8</sub> H <sub>16</sub> O <sub>2</sub> | 19.5                 | 2077                 | Acid           | Fatty, waxy, rancid, cheesy      | 1.73104E-05                   | 4.65514E-05 | 3.47141E-05 | 2.71749E-05 | 5.11016E-05 | 4.19597E-05                               | 2.47645E-05 | 0           | 0           | 0   |
| 5  | Propanoic acid | 79-09-4  | C <sub>3</sub> H <sub>6</sub> O <sub>2</sub>  | 12.6                 | 1549                 | Acid           | Pungent, acidic, cheesy, vinegar | 0                             | 0           | 0           | 1.44669E-05 | 1.71544E-05 | 0                                         | 1.33469E-05 | 0           | 0           | 0   |

|    |               |           |        |      |      |         |                                                                         |                 |                 |                 |                 |                 |                     |                     |                 |                 |                 |
|----|---------------|-----------|--------|------|------|---------|-------------------------------------------------------------------------|-----------------|-----------------|-----------------|-----------------|-----------------|---------------------|---------------------|-----------------|-----------------|-----------------|
|    |               |           |        |      |      |         |                                                                         |                 |                 |                 |                 |                 |                     | 05                  |                 |                 |                 |
| 6  | 1-Hexanol     | 111-27-3  | C6H14O | 9.6  | 1358 | Alcohol | Green, fruity, sweet                                                    | 1.1306<br>1E-05 | 7.48597<br>E-06 | 6.23502<br>E-06 | 6.79656<br>E-06 | 5.62038<br>E-06 | 7.581<br>96E-06     | 8.148<br>62E-05     | 0               | 0               | 0               |
| 7  | 1-Octanol     | 111-87-5  | C8H18O | 12.6 | 1548 | Alcohol | Mushroom, green,<br>waxy                                                | 0               | 0               | 0               | 0               | 0               | 0                   | 0                   | 0               | 0               | 4.317<br>49E-06 |
| 8  | 1-Octen-3-ol  | 3391-86-4 | C8H16O | 11.1 | 1453 | Alcohol | Mushroom                                                                | 0.0001<br>08602 | 7.89387<br>E-05 | 0.00011<br>246  | 0.000122<br>192 | 0.00012<br>6945 | 0.000<br>1171<br>02 | 0.000<br>1129<br>86 | 5.945<br>33E-05 | 4.576<br>77E-05 | 4.489<br>33E-05 |
| 9  | 1-Pentanol    | 71-41-0   | C5H12O | 8.0  | 1256 | Alcohol | Fresh, bready,<br>winey                                                 | 3.4081<br>5E-05 | 0.00010<br>8101 | 0.00011<br>1004 | 0.000106<br>372 | 0.00011<br>0896 | 6.817<br>37E-05     | 0.000<br>1628<br>8  | 5.756<br>53E-06 | 9.027<br>69E-06 | 9.838<br>97E-06 |
| 10 | 1-Penten-3-ol | 616-25-1  | C5H10O | 6.6  | 1163 | Alcohol | Pungent, green,<br>horseradish, green<br>vegetable, tropical,<br>fruity | 0.0001<br>30451 | 0.00013<br>3269 | 8.80199<br>E-05 | 0.000114<br>489 | 0.00013<br>0628 | 9.508<br>3E-05      | 7.846<br>61E-05     | 0               | 0               | 0               |
| 11 | Isobutanol    | 78-83-1   | C4H10O | 5.7  | 1098 | Alcohol | Ethereal, winey                                                         | 0               | 0               | 0               | 0               | 0               | 0                   | 0                   | 6.837<br>8E-    | 0               | 0               |

|    |                   |            |             |      |      |          |                                         |                 |                 |                 |                 |                 |                     |                     |                     |                    |                     |
|----|-------------------|------------|-------------|------|------|----------|-----------------------------------------|-----------------|-----------------|-----------------|-----------------|-----------------|---------------------|---------------------|---------------------|--------------------|---------------------|
|    |                   |            |             |      |      |          |                                         |                 |                 |                 |                 |                 |                     |                     | 06                  |                    |                     |
| 12 | Isopentyl alcohol | 123-51-3   | C5H12O      | 7.4  | 1215 | Alcohol  | Fusel, alcoholic, fruity, banana        | 3.8701<br>3E-06 | 1.64211<br>E-05 | 3.58926<br>E-06 | 4.64628<br>E-06 | 5.24433<br>E-07 | 2.801<br>9E-06      | 1.336<br>8E-05      | 6.884<br>74E-05     | 7.679<br>48E-05    | 4.841<br>16E-05     |
| 13 | Isophytol         | 505-32-8   | C20H40<br>O | 21.1 | 2290 | Alcohol  | Floral, herbal, green                   | 0.0002<br>83568 | 0.00024<br>7227 | 0.00030<br>138  | 0.000257<br>763 | 0.00021<br>8515 | 0.000<br>2522<br>64 | 0.000<br>2987<br>84 | 0.000<br>3068<br>44 | 0.000<br>2925<br>7 | 0.000<br>3684<br>16 |
| 14 | 2-Heptenal, (Z)-  | 57266-86-  | C7H12O      | 9.2  | 1334 | Aldehyde | Green, fatty, sweet                     | 3.5713<br>3E-05 | 4.22325<br>E-05 | 2.06006<br>E-05 | 3.77043<br>E-05 | 3.64459<br>E-05 | 6.316<br>58E-05     | 3.863<br>03E-05     | 5.355<br>39E-06     | 1.195<br>44E-05    | 1.841<br>86E-05     |
| 15 | 2-Hexenal, (E)-   | 6728-26-3  | C6H10O      | 7.6  | 1229 | Aldehyde | Green, banana, aldehydic, fresh, herbal | 4.1539<br>9E-05 | 2.95631<br>E-05 | 4.40041<br>E-05 | 3.84183<br>E-05 | 4.39E-05        | 4.755<br>77E-05     | 3.496<br>7E-05      | 1.343<br>8E-05      | 1.367<br>17E-05    | 7.358<br>64E-06     |
| 16 | 2-Nonenal, (E)-   | 18829-56-6 | C9H16O      | 12.6 | 1550 | Aldehyde | Cucumber, fatty, green                  | 1.3641<br>E-05  | 1.93503<br>E-05 | 6.58394<br>E-06 | 1.08327<br>E-05 | 1.23925<br>E-05 | 7.660<br>58E-06     | 4.314<br>69E-06     | 5.837<br>61E-06     | 2.550<br>98E-06    | 0                   |
| 17 | Heptanal          | 111-71-7   | C7H14O      | 7.0  | 1191 | Aldehyde | Fatty, green                            | 8.1421<br>8E-06 | 5.3004E-06      | 1.77838<br>E-05 | 1.34867<br>E-05 | 1.59664<br>E-05 | 1.346<br>07E-05     | 0                   | 0                   | 0                  | 3.113<br>4E-06      |

|    |                     |           |                                  |      |      |          |                                                    |                 |                 |                 |                 |                 |                 |                 |                 |                 |                 |
|----|---------------------|-----------|----------------------------------|------|------|----------|----------------------------------------------------|-----------------|-----------------|-----------------|-----------------|-----------------|-----------------|-----------------|-----------------|-----------------|-----------------|
| 18 | Hexanal             | 66-25-1   | C <sub>6</sub> H <sub>12</sub> O | 5.6  | 1085 | Aldehyde | Green, grassy                                      | 2.9506<br>9E-05 | 4.9805E<br>-05  | 7.3148<br>E-05  | 3.17118<br>E-06 | 4.81524<br>E-05 | 8.812<br>79E-05 | 2.973<br>48E-06 | 2.182<br>73E-05 | 2.396<br>16E-05 | 1.652<br>79E-05 |
| 19 | Nonanal             | 124-19-6  | C <sub>9</sub> H <sub>18</sub> O | 10.3 | 1400 | Aldehyde | Green, cucumber                                    | 3.6746<br>1E-05 | 3.55442<br>E-05 | 3.17581<br>E-05 | 3.06157<br>E-05 | 2.04399<br>E-05 | 2.305<br>36E-05 | 9.418<br>31E-06 | 8.651<br>51E-06 | 1.492<br>92E-05 | 1.392<br>31E-05 |
| 20 | 2-Octenal,<br>(E)-  | 2548-87-0 | C <sub>8</sub> H <sub>14</sub> O | 10.9 | 1441 | Aldehyde | Fresh, cucumber,<br>fatty, green, citrus           | 3.0478<br>E-05  | 3.47488<br>E-05 | 2.22665<br>E-05 | 3.24509<br>E-05 | 3.86952<br>E-05 | 2.441<br>24E-05 | 0               | 9.478<br>91E-06 | 1.051<br>35E-05 | 9.661<br>93E-06 |
| 21 | 2-Pentenal,<br>(E)- | 1576-87-0 | C <sub>5</sub> H <sub>8</sub> O  | 6.3  | 1138 | Aldehyde | Pungent, green,<br>fruity, apple<br>orange, tomato | 1.5116<br>4E-05 | 4.7341E<br>-05  | 4.86063<br>E-05 | 4.22268<br>E-05 | 4.86639<br>E-05 | 4.970<br>87E-05 | 2.668<br>13E-05 | 6.983<br>78E-06 | 9.204<br>E-06   | 2.390<br>77E-05 |
| 22 | 3-<br>methylbutanal | 590-86-3  | C <sub>5</sub> H <sub>10</sub> O | 3.9  | 921  | Aldehyde | Ethereal, aldehydic,<br>chocolate, peach,<br>fatty | 2.5536<br>3E-05 | 1.69893<br>E-05 | 1.53889<br>E-05 | 9.52913<br>E-06 | 1.05045<br>E-05 | 2.140<br>92E-05 | 5.196<br>1E-06  | 0               | 0               | 0               |
| 23 | 4-Heptenal,<br>(Z)- | 6728-31-0 | C <sub>7</sub> H <sub>12</sub> O | 7.9  | 1247 | Aldehyde | Green, oily, fatty,<br>dairy                       | 3.6757<br>5E-06 | 5.52971<br>E-06 | 4.70133<br>E-06 | 5.25069<br>E-06 | 5.82723<br>E-06 | 5.472<br>14E-06 | 3.674<br>06E-06 | 4.420<br>02E-06 | 0               | 2.936<br>83E-06 |
| 24 | beta-               | 432-      | C <sub>10</sub> H <sub>16</sub>  | 14.0 | 1643 | Aldehyde | Tropical, saffron,                                 | 9.1109          | 7.51192         | 3.68818         | 9.54359         | 6.1081          | 3.993           | 0.000           | 9.155           | 2.874           | 4.798           |

|    |               |          |                                   |      |      |          |                                                                                |             |             |             |             |             |             |             |             |             |             |
|----|---------------|----------|-----------------------------------|------|------|----------|--------------------------------------------------------------------------------|-------------|-------------|-------------|-------------|-------------|-------------|-------------|-------------|-------------|-------------|
|    | Cyclocitral   | 25-7     | O                                 |      |      |          | herbal, clean, rose,<br>sweet, tobacco,<br>green, fruity                       | 8E-05       | E-05        | E-05        | E-05        | E-05        | 24E-05      | 107971      | 99E-05      | 44E-05      | 27E-05      |
| 25 | cis-2-Butenal | 590-18-1 | C <sub>4</sub> H <sub>6</sub> O   | 5.1  | 1047 | Aldehyde | Pungent,<br>suffocating,<br>irritating                                         | 4.05156E-05 | 4.18626E-05 | 4.11305E-05 | 4.13284E-05 | 4.00872E-05 | 3.88505E-05 | 2.45241E-05 | 4.86375E-06 | 4.81032E-06 | 1.94214E-06 |
| 26 | Dodecanal     | 112-54-9 | C <sub>12</sub> H <sub>24</sub> O | 15.3 | 1732 | Aldehyde | Soapy, waxy,<br>aldehydic, citrus,<br>green, floral                            | 0.000104569 | 4.85737E-06 | 1.72808E-05 | 0           | 1.15631E-05 | 5.45698E-06 | 4.29987E-06 | 4.93151E-06 | 0           | 2.65449E-06 |
| 27 | Octanal       | 124-13-0 | C <sub>8</sub> H <sub>16</sub> O  | 8.6  | 1296 | Aldehyde | Orange peel, green                                                             | 0           | 3.71881E-06 | 3.18694E-06 | 6.57751E-06 | 3.00568E-06 | 3.68664E-06 | 0           | 0           | 0           | 0           |
| 28 | Pentanal      | 110-62-3 | C <sub>5</sub> H <sub>10</sub> O  | 4.5  | 984  | Aldehyde | Fermented, bready,<br>cocoa                                                    | 0.000164836 | 0.000127786 | 0.000128118 | 0.000111268 | 0.000125985 | 0.000137583 | 3.51212E-05 | 0           | 1.45685E-05 | 3.46825E-05 |
| 29 | Undecanal     | 112-44-7 | C <sub>11</sub> H <sub>22</sub> O | 13.6 | 1614 | Aldehyde | Waxy, soapy,<br>floral, aldehydic,<br>citrus, green, fatty,<br>laundered cloth | 0           | 3.1398E-06  | 2.86654E-06 | 0           | 0           | 0           | 0           | 0           | 0           | 0           |

|    |                                      |           |                                  |      |      |          |                                          |             |             |             |             |             |             |             |             |             |             |
|----|--------------------------------------|-----------|----------------------------------|------|------|----------|------------------------------------------|-------------|-------------|-------------|-------------|-------------|-------------|-------------|-------------|-------------|-------------|
| 30 | 4-ethylbenzaldehyde                  | 4748-78-1 | C <sub>9</sub> H <sub>10</sub> O | 15.2 | 1729 | Aromatic | Almond, bitter, sweet, anise cherry      | 1.90247E-05 | 6.79073E-05 | 8.25158E-05 | 8.93263E-05 | 0.000107134 | 3.87547E-05 | 0           | 0           | 0           | 0           |
| 31 | Benzaldehyde                         | 100-52-7  | C <sub>7</sub> H <sub>6</sub> O  | 12.4 | 1540 | Aromatic | Almond, cherry, sharp, sweet             | 0.000686077 | 0.000670456 | 0.000738445 | 0.000639122 | 0.000723182 | 0.000667591 | 0.000174753 | 0.000287285 | 0.000264358 | 0.000245761 |
| 32 | Benzaldehyde, 2,4-dimethyl-          | 613-45-6  | C <sub>9</sub> H <sub>10</sub> O | 15.5 | 1751 | Aromatic | Naphthyl, cherry, almond, spicy, vanilla | 0.00014304  | 0.00020615  | 0.000191227 | 0.00017273  | 0.000183541 | 0.000185366 | 6.22234E-05 | 3.82608E-05 | 1.39722E-05 | 3.62033E-05 |
| 33 | Benzaldehyde, 3-methyl-              | 620-23-5  | C <sub>8</sub> H <sub>8</sub> O  | 13.9 | 1641 | Aromatic | Sweet, fruity, cherry, almond            | 3.63298E-05 | 0           | 0           | 0           | 0           | 0           | 0           | 0           | 0           | 0           |
| 34 | Benzene, 1,3-bis(1,1-dimethylethyl)- | 1014-60-4 | C <sub>14</sub> H <sub>22</sub>  | 10.8 | 1433 | Aromatic | -                                        | 4.89165E-05 | 5.79204E-05 | 6.22572E-05 | 5.59074E-05 | 4.92305E-05 | 7.00738E-05 | 0           | 3.06168E-05 | 4.80208E-05 | 3.11789E-05 |
| 35 | Benzyl alcohol                       | 100-51-6  | C <sub>7</sub> H <sub>8</sub> O  | 17.5 | 1892 | Aromatic | Floral, rose, phenolic, balsamic         | 0           | 0           | 0           | 0           | 0           | 0           | 3.24128E-05 | 2.45013E-05 | 0           | 0           |
| 36 | Naphthalene,                         | 447-      | C <sub>13</sub> H <sub>16</sub>  | 15.8 | 1768 | Aromatic | Licorice                                 | 0.0001      | 8.07668     | 0.00019     | 0.000154    | 0.00016     | 8.171       | 0.000       | 0.000       | 0.000       | 0.000       |

|    |                                      |                |             |      |      |          |                                                             |                 |                 |                 |                 |                 |                     |                     |                     |                     |                     |
|----|--------------------------------------|----------------|-------------|------|------|----------|-------------------------------------------------------------|-----------------|-----------------|-----------------|-----------------|-----------------|---------------------|---------------------|---------------------|---------------------|---------------------|
|    | 1,2-dihydro-<br>1,1,6-<br>trimethyl- | 53-0           |             |      |      |          |                                                             | 71255           | E-05            | 4913            | 746             | 5185            | 33E-<br>05          | 1792<br>82          | 1286<br>24          | 2094<br>27          | 2138<br>28          |
| 37 | Phenylacetaldehyde                   | 122-<br>78-1   | C8H8O       | 14.2 | 1659 | Aromatic | Rose, sweet, floral                                         | 0               | 1.34409<br>E-05 | 2.36096<br>E-05 | 0               | 7.33735<br>E-06 | 2.182<br>27E-<br>05 | 0                   | 0                   | 0                   | 0                   |
| 38 | Phenylethyl<br>alcohol               | 60-12-<br>8    | C8H10O      | 17.9 | 1933 | Aromatic | Floral, rose, sweet                                         | 0.0002<br>91961 | 0.00025<br>571  | 0.00027<br>5207 | 0.000254<br>718 | 0.00027<br>4726 | 0.000<br>1778<br>31 | 0.000<br>3015<br>47 | 0.001<br>5459<br>77 | 0.002<br>3880<br>9  | 0.002<br>4782<br>73 |
| 39 | p-Xylene                             | 106-<br>42-3   | C8H10       | 6.4  | 1147 | Aromatic | Sweet                                                       | 1.1166<br>8E-05 | 0               | 0               | 0               | 0               | 8.238<br>51E-<br>06 | 0                   | 0                   | 0                   | 0                   |
| 40 | 2,4-<br>Decadienal,<br>(E,E)-        | 25152<br>-84-5 | C10H16<br>O | 16.6 | 1827 | Enal     | Satty, chicken                                              | 0               | 0               | 0               | 0               | 1.28238<br>E-05 | 0                   | 0                   | 0                   | 0                   | 0                   |
| 41 | 2,4-<br>Heptadienal,<br>(E,E)-       | 4313-<br>03-5  | C7H10O      | 11.9 | 1507 | Enal     | Fatty, green, oily,<br>aldehydic,<br>vegetable,<br>cinnamon | 0.0005<br>76431 | 0.00070<br>9327 | 0.00077<br>8931 | 0.000728<br>95  | 0.00092<br>8734 | 0.000<br>7242<br>94 | 0.000<br>3731<br>58 | 0                   | 5.456<br>77E-<br>05 | 0.000<br>1060<br>13 |

|    |                        |           |                                                |      |      |       |                                          |                 |                 |                 |                 |                 |                     |                     |                     |                     |                     |
|----|------------------------|-----------|------------------------------------------------|------|------|-------|------------------------------------------|-----------------|-----------------|-----------------|-----------------|-----------------|---------------------|---------------------|---------------------|---------------------|---------------------|
| 42 | 2,4-Hexadienal, (E,E)- | 142-83-6  | C <sub>6</sub> H <sub>8</sub> O                | 10.5 | 1415 | Enal  | Sweet, green, spicy, floral, citrus      | 2.6175<br>3E-05 | 4.4413E<br>-05  | 3.19583<br>E-05 | 1.63111<br>E-05 | 1.95492<br>E-05 | 5.348<br>76E-05     | 0                   | 4.864<br>28E-06     | 3.272<br>38E-06     | 8.944<br>91E-06     |
| 43 | 2,4-Nonadienal, (E,E)- | 5910-87-2 | C <sub>9</sub> H <sub>14</sub> O               | 15.0 | 1717 | Enal  | Fatty, melon, cucumber, chicken fat      | 1.7184<br>7E-05 | 7.44766<br>E-05 | 7.43974<br>E-05 | 5.47693<br>E-05 | 9.9412<br>E-05  | 8.661<br>24E-05     | 1.738<br>4E-05      | 0                   | 0                   | 9.033<br>27E-06     |
| 44 | 2,6-Nonadienal, (E,Z)- | 557-48-2  | C <sub>9</sub> H <sub>14</sub> O               | 13.3 | 1599 | Enal  | Green, fatty, dry, cucumber, violet leaf | 4.2153<br>2E-05 | 2.43174<br>E-05 | 2.53043<br>E-05 | 3.00407<br>E-05 | 2.21378<br>E-05 | 1.305<br>E-05       | 2.798<br>58E-05     | 1.365<br>66E-05     | 1.382<br>85E-05     | 4.886<br>94E-06     |
| 45 | Methyl palmitate       | 112-39-0  | C <sub>17</sub> H <sub>34</sub> O <sub>2</sub> | 20.7 | 2228 | Ester | Fatty, waxy                              | 6.4327<br>E-05  | 1.85663<br>E-05 | 3.67519<br>E-05 | 5.34491<br>E-05 | 2.14683<br>E-05 | 3.953<br>51E-05     | 2.320<br>69E-05     | 4.145<br>7E-05      | 4.105<br>57E-05     | 1.847<br>66E-05     |
| 46 | Methyl salicylate      | 119-36-8  | C <sub>8</sub> H <sub>8</sub> O <sub>3</sub>   | 16.2 | 1799 | Ester | Wintergreen, minty                       | 0.0007<br>48143 | 0.00064<br>7308 | 0.00058<br>2888 | 0.000574<br>573 | 0.00052<br>8463 | 0.000<br>5890<br>75 | 0.000<br>6150<br>54 | 0.000<br>1730<br>08 | 0.000<br>5354<br>53 | 0.000<br>5405<br>67 |
| 47 | 2-Acetyl-5-methylfuran | 1193-79-9 | C <sub>7</sub> H <sub>8</sub> O <sub>2</sub>   | 13.4 | 1607 | Furan | Sweet, musty, nutty, caramellic          | 0               | 0               | 0               | 0               | 0               | 0                   | 0                   | 0                   | 8.277<br>36E-05     | 0                   |
| 48 | 2-ethylfuran           | 3208-     | C <sub>6</sub> H <sub>8</sub> O                | 4.2  | 955  | Furan | Chemical, beany,                         | 2.9886          | 2.66821         | 2.75321         | 2.68418         | 3.24093         | 3.115               | 2.309               | 2.124               | 1.554               | 2.426               |

|    |                  |           |        |      |      |       |                                                     |             |             |             |             |             |             |             |             |             |             |
|----|------------------|-----------|--------|------|------|-------|-----------------------------------------------------|-------------|-------------|-------------|-------------|-------------|-------------|-------------|-------------|-------------|-------------|
|    |                  | 16-0      |        |      |      |       | ethereal, cocoa,<br>bready, malty,<br>coffee, nutty | 7E-05       | E-05        | E-05        | E-05        | E-05        | 1E-05       | 77E-05      | 33E-05      | 44E-05      | 48E-05      |
| 49 | 2-Pentylfuran    | 3777-69-3 | C9H14O | 7.6  | 1234 | Furan | Fruity, beany,<br>vegetable                         | 0.000262495 | 0.000170152 | 0.000153915 | 0.000109902 | 8.60189E-05 | 0.000304494 | 8.22013E-05 | 7.5605E-05  | 6.40852E-05 | 0.000113595 |
| 50 | 3-Furanmethanol  | 4412-91-3 | C5H6O2 | 14.3 | 1669 | Furan | Sweet, nutty, herbal                                | 0           | 0           | 0           | 0           | 0           | 0           | 1.66561E-05 | 0           | 0           | 0           |
| 51 | 5-methylfurfural | 620-02-0  | C6H6O2 | 12.9 | 1568 | Furan | Sweet, caramel,<br>maple                            | 1.64153E-05 | 1.40762E-05 | 1.45381E-05 | 1.31659E-05 | 1.43611E-05 | 1.52432E-05 | 0           | 0           | 0           | 0           |
| 52 | Furan, 2-methyl- | 534-22-5  | C5H6O2 | 3.6  | 874  | Furan | Chocolate, ethereal,<br>acetone                     | 3.37885E-06 | 1.99509E-06 | 1.92152E-06 | 1.74903E-06 | 0           | 3.19082E-06 | 5.8813E-07  | 1.14447E-06 | 0           | 1.37179E-06 |
| 53 | Furfural         | 98-01-1   | C5H4O2 | 11.4 | 1473 | Furan | Sweet, woody,<br>almond, bread,<br>baked            | 0.000192257 | 0.000176687 | 0.000234249 | 0.000142119 | 9.04195E-05 | 0.000169261 | 2.00106E-05 | 2.41157E-06 | 0           | 0           |
| 54 | trans-2-(2-      | 70424     | C9H12O | 8.8  | 1306 | Furan | Bean, grassy                                        | 5.5219      | 1.06584     | 1.05849     | 9.12875     | 1.08564     | 9.220       | 0           | 1.834       | 3.566       | 0           |

|    |                           |            |        |      |      |             |                       |             |             |             |             |             |             |             |             |             |             |
|----|---------------------------|------------|--------|------|------|-------------|-----------------------|-------------|-------------|-------------|-------------|-------------|-------------|-------------|-------------|-------------|-------------|
|    | Pentenyl)furan            | -14-5      |        |      |      |             |                       | 5E-06       | E-05        | E-05        | E-06        | E-05        | 86E-06      |             | 51E-06      | 62E-07      |             |
| 55 | 1,3,5,7-Cyclooctatetraene | 629-20-9   | C8H8   | 8.1  | 1265 | Hydrocarbon | -                     | 0           | 0           | 0           | 0           | 0           | 0           | 0           | 0           | 0           | 1.98204E-06 |
| 56 | 3-Heptadecene, (Z)-       | 68155-00-0 | C9H18O | 15.1 | 1723 | Hydrocarbon | -                     | 0.000283823 | 0.000362702 | 0.00058726  | 0.000529519 | 0.00050902  | 0.000171216 | 0.000183636 | 0.000484612 | 0.000403239 | 0.000484425 |
| 57 | Heptadecane               | 629-78-7   | C17H36 | 14.8 | 1698 | Hydrocarbon | Waxy                  | 0.000700864 | 0.000731208 | 0.001215075 | 0.001006742 | 0.001170633 | 0442546     | 0.000442546 | 0.00047186  | 0.000493414 | 0.000950684 |
| 58 | Pentadecane               | 629-62-9   | C15H32 | 11.8 | 1498 | Hydrocarbon | -                     | 4.04429E-05 | 9.63707E-05 | 0.000130275 | 9.38504E-05 | 0.000123106 | 6.7386E-05  | 6.13493E-05 | 4.87533E-05 | 5.03987E-05 | 5.40487E-05 |
| 59 | Undecane                  | 1120-21-4  | C10H22 | 4.6  | 999  | Hydrocarbon | -                     | 0           | 4.80151E-06 | 5.10924E-06 | 4.5991E-06  | 0           | 3.23377E-06 | 0           | 2.66008E-06 | 0           | 6.42428E-06 |
| 60 | (E,E)-3,5-Octadiene-2-    | 30086-02-3 | C8H12O | 13.1 | 1584 | Ketone      | Fruity, green, grassy | 0.001027837 | 0.000853237 | 0.00081154  | 0.00071048  | 0.000752466 | 0.0009705   | 0.0008568   | 0.0002118   | 0.0001063   | 7.81424E-   |

|    |                             |           |                                              |      |      |        |                                                 |            |             |             |             |             |             |             |             |             |             |
|----|-----------------------------|-----------|----------------------------------------------|------|------|--------|-------------------------------------------------|------------|-------------|-------------|-------------|-------------|-------------|-------------|-------------|-------------|-------------|
|    | one                         |           |                                              |      |      |        |                                                 |            |             |             |             |             | 66          | 94          | 37          | 35          | 05          |
| 61 | 1-Octen-3-one               | 4312-99-6 | C <sub>8</sub> H <sub>14</sub> O             | 8.8  | 1309 | Ketone | Herbal, mushroom, earthy, must,y dirty          | 1.3969E-05 | 1.60312E-05 | 1.79359E-05 | 0           | 1.32361E-05 | 1.37119E-05 | 1.8517E-05  | 1.60293E-05 | 5.74918E-06 | 1.69357E-05 |
| 62 | 1-Penten-3-one              | 1629-58-9 | C <sub>5</sub> H <sub>8</sub> O              | 4.9  | 1026 | Ketone | Spicy, pungent, peppery, mustard, garlic, onion | 0          | 0           | 1.80323E-05 | 0           | 0           | 0           | 1.4325E-05  | 0           | 0           | 0           |
| 63 | 1-Propanone, 1-(2-furanyl)- | 3194-15-8 | C <sub>7</sub> H <sub>8</sub> O <sub>2</sub> | 13.2 | 1590 | Ketone | Fruity                                          | 0          | 0           | 0           | 0           | 0           | 0           | 0           | 0           | 3.11861E-06 | 4.629E-06   |
| 64 | 2,3-Butanedione             | 431-03-8  | C <sub>4</sub> H <sub>6</sub> O <sub>2</sub> | 4.4  | 976  | Ketone | Buttery, sweet, creamy, pungent, caramellic     | 0          | 0           | 0           | 1.55107E-05 | 0           | 0           | 0           | 2.16852E-05 | 0           | 0           |
| 65 | 2,3-Pentanedione            | 600-14-6  | C <sub>5</sub> H <sub>8</sub> O <sub>2</sub> | 5.2  | 1056 | Ketone | Sweet, buttery, creamy                          | 7.004E-06  | 2.19717E-05 | 2.35508E-05 | 2.08714E-05 | 2.55922E-05 | 2.23478E-05 | 1.63437E-05 | 1.83899E-05 | 1.67855E-05 | 5.24942E-06 |
| 66 | 2-Butanone                  | 78-93-3   | C <sub>4</sub> H <sub>8</sub> O              | 3.8  | 908  | Ketone | Acetone, ethereal, fruity, camphoraceous        | 0.00024514 | 0.000221226 | 0.000348183 | 0.000155413 | 0.000153143 | 0.000223449 | 0.000126828 | 0.000274341 | 0.000202228 | 0.000144416 |

|    |                                     |            |         |      |      |        |                                                            |                 |                 |                 |                 |                 |                     |                     |                     |                     |                     |
|----|-------------------------------------|------------|---------|------|------|--------|------------------------------------------------------------|-----------------|-----------------|-----------------|-----------------|-----------------|---------------------|---------------------|---------------------|---------------------|---------------------|
| 67 | 2-Heptanone                         | 110-43-0   | C7H14O  | 7.0  | 1187 | Ketone | Cheesy, fruity, ketogenic, green, banana, creamy           | 3.4466<br>9E-05 | 1.6017E-05      | 1.51541<br>E-05 | 0               | 0               | 0                   | 0                   | 0                   | 0                   | 0                   |
| 68 | 2-Nonanone                          | 821-55-6   | C9H18O  | 10.2 | 1397 | Ketone | Fruity, sweet, waxy, soapy, cheesy, green, herbal, coconut | 1.3666<br>9E-05 | 2.43512<br>E-05 | 3.91895<br>E-05 | 0               | 0               | 4.486<br>29E-05     | 1.563<br>26E-05     | 0                   | 0                   | 0                   |
| 69 | 2-Pentadecanone, 6,10,14-trimethyl- | 502-69-2   | C18H36O | 20.0 | 2137 | Ketone | Oily, herbal, jasmine, celery, woody                       | 0.0003<br>21032 | 0.00029<br>6771 | 0.00032<br>2788 | 0.000317<br>161 | 0.00039<br>4462 | 0.000<br>2991<br>94 | 0.000<br>2071<br>34 | 0.000<br>1879<br>17 | 0.000<br>2342<br>06 | 0.000<br>2122<br>84 |
| 70 | 2-Tridecanone                       | 593-08-8   | C13H26O | 16.5 | 1820 | Ketone | Fatty, waxy, dairy, milky                                  | 2.1947<br>6E-05 | 2.93369<br>E-05 | 1.91158<br>E-05 | 2.79608<br>E-05 | 3.16983<br>E-05 | 2.987<br>41E-05     | 2.029<br>39E-05     | 0                   | 0                   | 0                   |
| 71 | 3,5-Octadien-2-one                  | 38284-27-4 | C8H12O  | 12.3 | 1532 | Ketone | Fruity, fatty, mushroom                                    | 0.0001<br>41213 | 0.00015<br>384  | 0.00016<br>6226 | 9.56053<br>E-05 | 0.00012<br>918  | 0.000<br>1088<br>19 | 9.728<br>88E-05     | 0                   | 0                   | 0                   |
| 72 | 3-Nonen-2-one                       | 14309-57-0 | C9H16O  | 12.2 | 1524 | Ketone | Fruity, berry, fatty, oily                                 | 0               | 1.54487<br>E-05 | 1.45496<br>E-05 | 2.19196<br>E-05 | 2.7222<br>E-05  | 2.130<br>97E-05     | 1.197<br>24E-05     | 5.082<br>51E-06     | 0                   | 0                   |

|    |                               |           |        |      |      |        |                                                      |                 |                 |                 |                 |                 |                     |                     |                 |                 |                 |
|----|-------------------------------|-----------|--------|------|------|--------|------------------------------------------------------|-----------------|-----------------|-----------------|-----------------|-----------------|---------------------|---------------------|-----------------|-----------------|-----------------|
| 73 | 3-Octanone                    | 106-68-3  | C8H16O | 8.1  | 1260 | Ketone | Lavender, mushroom, sweet                            | 1.0029<br>4E-05 | 7.74798<br>E-06 | 3.31775<br>E-06 | 0               | 0               | 9.172<br>42E-06     | 2.680<br>99E-05     | 0               | 0               | 1.463<br>66E-06 |
| 74 | 3-Octanone, 2-methyl-         | 923-28-4  | C9H18O | 9.0  | 1323 | Ketone | -                                                    | 0.0001<br>0475  | 7.37462<br>E-05 | 0.00010<br>4964 | 0               | 3.45306<br>E-05 | 0.000<br>1234<br>55 | 1.749<br>83E-05     | 0               | 0               | 0               |
| 75 | 5-Hepten-2-one, 6-methyl-     | 110-93-0  | C8H14O | 9.4  | 1345 | Ketone | Citrus, green, musty, lemongrass, apple              | 2.8076<br>4E-05 | 2.42381<br>E-05 | 2.37667<br>E-05 | 2.75072<br>E-05 | 3.0203<br>E-05  | 2.553<br>02E-05     | 1.943<br>99E-05     | 0               | 0               | 0               |
| 76 | 6-Methyl-3,5-heptadiene-2-one | 1604-28-0 | C8H12O | 13.5 | 1608 | Ketone | Spicy, cinnamon, coconut, spicy, woody, sweet, weedy | 0.0001<br>8724  | 0.00024<br>5117 | 0.00024<br>3097 | 0.000150<br>534 | 0.00023<br>5556 | 0.000<br>2630<br>96 | 0.000<br>1792<br>41 | 0               | 0               | 0               |
| 77 | Acetoin                       | 513-86-0  | C4H8O2 | 8.7  | 1299 | Ketone | Buttery, creamy, dairy, milky, fatty                 | 0               | 0               | 0               | 0               | 1.11621<br>E-05 | 0                   | 0                   | 0               | 0               | 0               |
| 78 | Acetone                       | 67-64-1   | C3H6O  | 3.2  | 818  | Ketone | Solvent, ethereal, apple, pear                       | 0               | 0               | 0               | 0               | 1.89788<br>E-05 | 0                   | 1.275<br>31E-05     | 1.878<br>63E-05 | 9.595<br>86E-05 | 9.938<br>38E-05 |
| 79 | Acetophenone                  | 98-86-    | C8H8O  | 14.4 | 1670 | Ketone | Sweet, hawthorn                                      | 1.4756          | 0               | 0               | 0               | 0               | 0                   | 1.450               | 0               | 0               | 0               |

|    |                                         |                |              |      |      |         |                                                                     |                 |                 |                 |                 |                 |                     |                     |                     |                     |                     |
|----|-----------------------------------------|----------------|--------------|------|------|---------|---------------------------------------------------------------------|-----------------|-----------------|-----------------|-----------------|-----------------|---------------------|---------------------|---------------------|---------------------|---------------------|
|    |                                         | 2              |              |      |      |         |                                                                     | 9E-05           |                 |                 |                 |                 |                     | 63E-05              |                     |                     |                     |
| 80 | Cyclohexanon<br>e, 2,2,6-<br>trimethyl- | 2408-<br>37-9  | C9H16O       | 9.2  | 1335 | Ketone  | Thujonic, pungent,<br>labdanum, honey                               | 2.4851<br>9E-05 | 5.27998<br>E-05 | 4.69297<br>E-05 | 2.01988<br>E-05 | 3.13161<br>E-05 | 4.283<br>09E-<br>05 | 2.552<br>85E-<br>05 | 2.175<br>41E-<br>05 | 0                   | 5.135<br>E-06       |
| 81 | Isophorone                              | 78-59-<br>1    | C9H14O       | 13.6 | 1621 | Ketone  | Cooling, woody,<br>sweet, green,<br>camphoraceous,<br>fruity, musty | 8.9816<br>5E-05 | 0.00012<br>6727 | 4.45773<br>E-05 | 0               | 4.33334<br>E-05 | 3.967<br>4E-<br>05  | 8.854<br>49E-<br>05 | 4.153<br>23E-<br>05 | 7.954<br>99E-<br>05 | 0.000<br>1170<br>45 |
| 82 | m-<br>Methylacetop<br>henone            | 585-<br>74-0   | C9H10O       | 16.2 | 1795 | Ketone  | Hawthorn, sweet,<br>mimosa,<br>coumarinic, cherry,<br>acacia        | 0.0002<br>03678 | 0.00021<br>3941 | 0.00021<br>4632 | 0.000199<br>17  | 0.00020<br>2363 | 0.000<br>2366<br>24 | 0.000<br>1757<br>38 | 0.000<br>1643<br>06 | 0.000<br>1879<br>12 | 0.000<br>1846<br>4  |
| 83 | alpha-Ionone                            | 127-<br>41-3   | C13H20<br>O  | 17.2 | 1874 | Terpene | Sweet, woody,<br>floral, violet, orris,<br>tropical, fruity         | 0.0021<br>00297 | 0.00127<br>0786 | 0.00192<br>1168 | 0.001877<br>712 | 0.00126<br>9374 | 0.002<br>0122<br>84 | 0.001<br>8867<br>74 | 0.001<br>8128<br>74 | 0.001<br>8023<br>84 | 0.001<br>9332<br>68 |
| 84 | beta-Ionone<br>epoxide                  | 23267<br>-57-4 | C13H20<br>O2 | 18.9 | 2019 | Terpene | Fruity, sweet,<br>berry, woody,<br>violet, orris,<br>powdery        | 0.0014<br>56673 | 0.00133<br>0894 | 0.00131<br>4103 | 0.001370<br>537 | 0.00149<br>5476 | 0.001<br>3948<br>85 | 0.001<br>3816<br>75 | 0.001<br>1931<br>37 | 0.001<br>3258<br>55 | 0.001<br>4819<br>14 |

|    |                         |            |                                                 |      |      |          |                                                  |             |             |             |             |             |             |             |             |             |             |
|----|-------------------------|------------|-------------------------------------------------|------|------|----------|--------------------------------------------------|-------------|-------------|-------------|-------------|-------------|-------------|-------------|-------------|-------------|-------------|
| 85 | Neophytadiene           | 504-96-1   | C <sub>20</sub> H <sub>38</sub>                 | 17.9 | 1929 | Terpene  | -                                                | 0.000179889 | 0.000251886 | 0.000341725 | 0.000260144 | 0.000364417 | 0.000273054 | 0.000324966 | 0.00032797  | 0.000322565 | 0.000437689 |
| 86 | trans-beta-Ionone       | 79-77-6    | C <sub>13</sub> H <sub>20</sub> O               | 18.3 | 1966 | Terpene  | dry powdery floral<br>woody orris berry<br>seedy | 0.001467838 | 0           | 0.004007879 | 0.001349576 | 0           | 0.004001712 | 0.003838057 | 0.003551018 | 0.003691388 | 0.003880322 |
| 87 | trans-Geranylacetone    | 3796-70-1  | C <sub>13</sub> H <sub>22</sub> O               | 17.1 | 1865 | Terpene  | Floral, fresh, green,<br>rose                    | 0.000366719 | 0.000322123 | 0.000318789 | 0.000209751 | 0.000342013 | 0.000337794 | 0.000332665 | 0           | 0           | 0           |
| 88 | 2-Acetylthiazole        | 24295-03-2 | C <sub>5</sub> H <sub>5</sub> NO <sub>2</sub> S | 14.3 | 1665 | Others   | Pandan, popcorn,<br>hazelnut, peanut             | 4.19906E-05 | 5.78992E-05 | 6.20847E-05 | 3.29585E-05 | 7.25037E-05 | 6.0368E-05  | 1.98643E-05 | 1.23594E-06 | 0           | 0           |
| 89 | 2,3,5-Trimethylpyrazine | 14667-55-1 | C <sub>7</sub> H <sub>10</sub> N <sub>2</sub>   | 10.6 | 1421 | Pyrazine | Nutty                                            | 5.56146E-06 | 6.45521E-06 | 1.25676E-05 | 0           | 0           | 0           | 4.92684E-06 | 1.19941E-05 | 1.3142E-05  | 1.35664E-05 |
| 90 | 2,5-Dimethylpyrazine    | 123-32-0   | C <sub>6</sub> H <sub>8</sub> N <sub>2</sub>    | 9.3  | 1340 | Pyrazine | Cocoa, roasted,<br>beefy, nutty                  | 2.83319E-05 | 0           | 0           | 2.30964E-05 | 1.68021E-05 | 0           | 1.85597E-05 | 0           | 4.28933E-05 | 1.95621E-05 |
| 91 | 2,6-                    | 108-       | C <sub>6</sub> H <sub>8</sub> N <sub>2</sub>    | 9.3  | 1338 | Pyrazine | Cocoa, roasted,                                  | 0           | 0           | 0           | 0           | 0           | 0           | 0           | 1.703       | 0           | 1.017       |

|    |                              |            |         |      |      |          |                                |             |             |             |             |             |             |             |             |             |             |
|----|------------------------------|------------|---------|------|------|----------|--------------------------------|-------------|-------------|-------------|-------------|-------------|-------------|-------------|-------------|-------------|-------------|
|    | dimethylpyrazine             | 50-9       |         |      |      |          | nutty, meaty                   |             |             |             |             |             |             |             | 75E-05      |             | 84E-05      |
| 92 | 2-ethyl-3,6-dimethylpyrazine | 13360-65-1 | C8H12N2 | 11.2 | 1460 | Pyrazine | Roasted, potato                | 2.4717E-05  | 2.25479E-05 | 2.13461E-05 | 1.89756E-05 | 2.06317E-05 | 2.2107E-05  | 5.59949E-06 | 2.93993E-05 | 1.99367E-05 | 1.892E-05   |
| 93 | 2-Ethyl-5-methylpyrazine     | 13360-64-0 | C7H10N2 | 10.4 | 1408 | Pyrazine | Coffee, nut                    | 8.4125E-06  | 1.40265E-05 | 1.44929E-05 | 1.0381E-05  | 1.704E-05   | 1.73075E-05 | 1.08178E-05 | 8.73359E-06 | 1.25065E-05 | 1.31454E-05 |
| 94 | 2-Ethylpyrazine              | 13925-00-3 | C6H8N2  | 9.5  | 1350 | Pyrazine | Nutty, fermented coffee, meaty | 0           | 1.4925E-06  | 0           | 0           | 0           | 0           | 0           | 0           | 0           | 0           |
| 95 | 2-Methylpyrazine             | 109-08-0   | C5H6N2  | 8.4  | 1281 | Pyrazine | Nutty, cocoa, chocolate        | 5.64735E-06 | 1.56795E-05 | 1.67164E-05 | 1.50864E-05 | 1.66667E-05 | 1.35332E-05 | 0           | 1.45025E-05 | 1.58873E-05 | 1.60826E-05 |
| 96 | 2,4,6-trimethylpyridine      | 108-75-8   | C8H11N  | 10.0 | 1388 | Pyridine | -                              | 5.35797E-06 | 6.96537E-06 | 8.23105E-06 | 6.81916E-06 | 7.76736E-06 | 8.21101E-06 | 4.28681E-06 | 7.05771E-06 | 4.94132E-06 | 5.82558E-06 |
| 97 | 3-methylpyridine             | 108-99-6   | C6H7N   | 8.9  | 1316 | Pyridine | Green, earthy, hazelnut, nutty | 4.72888E-06 | 3.89947E-06 | 0           | 7.09646E-06 | 0           | 3.85177E-06 | 0           | 0           | 8.36633E-06 | 4.07514E-06 |

|     |                                         |            |                                              |      |      |            |                                       |                 |                 |                 |                 |                 |                     |                    |                    |                     |                     |
|-----|-----------------------------------------|------------|----------------------------------------------|------|------|------------|---------------------------------------|-----------------|-----------------|-----------------|-----------------|-----------------|---------------------|--------------------|--------------------|---------------------|---------------------|
| 98  | Pyridine                                | 110-86-1   | C <sub>5</sub> H <sub>5</sub> N              | 7.2  | 1204 | Pyridine   | Sour, fishy                           | 1.0131<br>6E-05 | 9.70381<br>E-06 | 1.02752<br>E-05 | 7.86009<br>E-06 | 6.04669<br>E-06 | 1.053<br>57E-05     | 1.152<br>31E-05    | 1.073<br>48E-05    | 9.524<br>69E-06     | 9.122<br>24E-06     |
| 99  | 1H-Pyrrole-2,5-dione, 3-ethyl-4-methyl- | 21494-57-5 | C <sub>7</sub> H <sub>9</sub> NO             | 21.2 | 2298 | Pyrrole    | -                                     | 0.0001<br>92216 | 0.00016<br>3596 | 0.00018<br>2589 | 0.000195<br>079 | 0.00021<br>8631 | 0.000<br>1708<br>95 | 0.000<br>1886<br>6 | 0.000<br>1682<br>9 | 0.000<br>1784<br>33 | 0.000<br>1967<br>25 |
| 101 | Dimethyl trisulfide                     | 3658-80-8  | C <sub>2</sub> H <sub>6</sub> S <sub>3</sub> | 10.2 | 1399 | Sulphurous | Sulphurous, onion, meaty, rotten eggs | 0               | 0               | 0               | 2.53319<br>E-06 | 0               | 0                   | 0                  | 0                  | 0                   | 0                   |

247 Summary of all the volatile compounds detected by GC-MS in unfermented microalgae samples and *L. plantarum*-fermented microalgae samples  
248 across different time points (0h, 24h, 48h, 72h, and 96h). Each compound entry includes its chemical name, CAS number, molecular formula,  
249 retention time (min), retention index (RI), compound class, and odour description and abundances at different time points.

250

251 **Table S4: ASTREE E-tongue sensor summary with food applications**

|   | Sensor | Taste Modality    | Sensitivity and typical detected compounds                                | Common applications                                                                                                                                                                                          |
|---|--------|-------------------|---------------------------------------------------------------------------|--------------------------------------------------------------------------------------------------------------------------------------------------------------------------------------------------------------|
| 1 | AHS    | Sour              | Organic acids, H <sup>+</sup> ions                                        | <ul style="list-style-type: none"> <li>· Fermented foods (e.g., yogurt, kimchi, sauerkraut).</li> <li>· Vinegar/acidity profiling in sauces.</li> <li>· Spoilage detection (e.g., acid build-up).</li> </ul> |
| 2 | CTS    | Salty             | Na <sup>+</sup> , K <sup>+</sup> , Cl <sup>-</sup> , mineral salts        | <ul style="list-style-type: none"> <li>· Salt reduction in soups and snacks.</li> <li>· Mineral water profiling.</li> <li>· Electrolyte beverage development.</li> </ul>                                     |
| 3 | NMS    | Umami             | Glutamate, IMP, GMP, amino acids                                          | <ul style="list-style-type: none"> <li>· Umami enhancement in broth/stock.</li> <li>· Fermented soy (miso, soy sauce).</li> <li>· Meat analogues or plant-based meat optimization.</li> </ul>                |
| 4 | ANS    | Sweet             | Glucose, fructose, sucrose, and artificial sweeteners                     | <ul style="list-style-type: none"> <li>· Sweetener formulation in beverages</li> <li>· Sugar content consistency in fruit juices</li> <li>· Sugar-free product comparisons</li> </ul>                        |
| 5 | SCS    | Bitter            | Caffeine, polyphenols, quinine, alkaloids                                 | <ul style="list-style-type: none"> <li>· Coffee and tea bitterness profiling.</li> <li>· Cocoa/chocolate evaluation.</li> <li>· Bitterness masking in functional foods/supplements.</li> </ul>               |
| 6 | PKS    | General/Reference | Detects overall ionic strength or changes in general chemical environment | <ul style="list-style-type: none"> <li>· Acts as a reference to help differentiate complex mixtures and stabilize the signal</li> </ul>                                                                      |
| 7 | CPS    | General/Reference |                                                                           |                                                                                                                                                                                                              |

252 Description of electronic tongue (E-tongue) sensors used for taste modality detection in food  
253 samples. The table summarizes the target analytes for each sensor and their common  
254 applications in food quality evaluation, flavour profiling, and product development <sup>5-13</sup>.

255

256 **Table S5. Metabolite profile of umami-related compounds detected during *L. plantarum*-**  
257 **mediated biotransformation of microalgae**

| Compound name | Mass to charge ratio (m/z) | Peak Area                  |                             |                             |                             |                             |
|---------------|----------------------------|----------------------------|-----------------------------|-----------------------------|-----------------------------|-----------------------------|
|               |                            | <i>L. plantarum</i> _MA_0h | <i>L. plantarum</i> _MA_24h | <i>L. plantarum</i> _MA_48h | <i>L. plantarum</i> _MA_72h | <i>L. plantarum</i> _MA_96h |
| Glutamic acid | 148.0605                   | 26077.91                   | 25747.33                    | 7396.46                     | 6104.25                     | 4747.83                     |

|                                             |          |             |             |             |             |             |
|---------------------------------------------|----------|-------------|-------------|-------------|-------------|-------------|
| 3'-AMP                                      | 346.0547 | 15341.44    | 15621.17    | 64523.82    | 71823.88    | 56305.31    |
| Adenosine 2',3'-cyclic monophosphate (cAMP) | 330.059  | 10029.51    | 8643.28     | 14599.89    | 8634.29     | 4084.71     |
| Adenosine 5'-monophosphate (AMP)            | 348.07   | 1293.7      | 13687.83    | 57535.56    | 68646.83    | 57002.32    |
| Cyclic GMP (cGMP)                           | 344.0396 | 4024.884766 | 4647.526367 | 7276.584961 | 3959.945313 | 774.7654419 |
| Guanosine 5'-monophosphate                  | 362.0501 | 40930.2     | 48802.02    | 61079.58    | 32945.93    | 15488.41    |

258 Umami-related compounds were detected using LC-MS and identified based on their mass-to-  
259 charge ratio (m/z) Peak area values represent relative abundances at each fermentation time  
260 point (0h, 24h, 48h, 72h, 96h).

261

262 **Table S6. Metabolite profile of amino acids and their bioconversion products during *L.***  
263 ***plantarum*-mediated biotransformation of microalgae**

| Compound name              | Mass to charge ratio (m/z) | Peak Area                  |                             |                             |                             |                             |
|----------------------------|----------------------------|----------------------------|-----------------------------|-----------------------------|-----------------------------|-----------------------------|
|                            |                            | <i>L. plantarum</i> _MA_0h | <i>L. plantarum</i> _MA_24h | <i>L. plantarum</i> _MA_48h | <i>L. plantarum</i> _MA_72h | <i>L. plantarum</i> _MA_96h |
| L-Tyrosine                 | 182.0787                   | 37898                      | 34893                       | 7181                        | 0                           | 0                           |
| Phenylalanine              | 166.0866                   | 89252                      | 89795                       | 8013                        | 6714                        | 4542                        |
| 4-Hydroxyphenyllactic acid | 181.0503                   | 7257                       | 5588                        | 87693                       | 127266                      | 145663                      |
| D-Tryptophan               | 205.0973                   | 58778                      | 57684                       | 8754                        | 16172                       | 13113                       |
| D-3-phenyllactic acid      | 165.0557                   | 28351                      | 20197                       | 136790                      | 327943                      | 389709                      |
| DL-Indole-3-lactic acid    | 204.0666                   | 0                          | 0                           | 24333.55                    | 53092.48                    | 60450.36                    |

264 Amino acids and their relevant metabolites were detected using LC-MS and identified based  
 265 on their mass-to-charge ratio (m/z). Peak area values represent relative abundances at each  
 266 fermentation time point (0h, 24h, 48h, 72h, 96h).

267

268 **Table S7. Demographic and lifestyle information of the sniff test panellists (n = 10).**

| <b>Participant<br/>(n=10)</b> | <b>Gender</b> | <b>Age<br/>range</b> | <b>Race</b> | <b>Diet</b> | <b>Smoker?</b> | <b>Self-rated smell<br/>sensitivity</b> |
|-------------------------------|---------------|----------------------|-------------|-------------|----------------|-----------------------------------------|
| 1                             | Male          | 31-40                | Chinese     | Omnivore    | No             | 5                                       |
| 2                             | Male          | 41-50                | Chinese     | Omnivore    | No             | 2                                       |
| 3                             | Male          | 31-40                | Chinese     | Omnivore    | No             | 3                                       |
| 4                             | Male          | 21-30                | Chinese     | Omnivore    | No             | 3                                       |
| 5                             | Male          | 31-40                | Chinese     | Omnivore    | No             | 3                                       |
| 6                             | Female        | 31-40                | Chinese     | Omnivore    | No             | 5                                       |
| 7                             | Female        | 41-50                | Indian      | Omnivore    | No             | 3                                       |
| 8                             | Female        | 31-40                | Malay       | Omnivore    | No             | 5                                       |
| 9                             | Female        | 21-30                | Chinese     | Omnivore    | No             | 3                                       |
| 10                            | Female        | 31-40                | Chinese     | Omnivore    | No             | 3                                       |

269 Demographic details and lifestyle factors of the untrained olfactory evaluation panel (n = 10).  
 270 All panellists were non-smokers and followed an omnivorous diet. Self-rated olfactory  
 271 sensitivity was collected using a 5-point scale (1 = very poor, 5 = very strong).

272

273 **Table S8. Two-way ANOVA statistics for grassy odour intensity.**

| ANOVA table                    | SS     | DF | MS     | F (DFn, DFd)             | P value  | Significance and Interpretation                                     |
|--------------------------------|--------|----|--------|--------------------------|----------|---------------------------------------------------------------------|
| Interaction (Time × Treatment) | 3.400  | 4  | 0.8500 | F (4, 72) = 3.161        | P=0.0188 | The change in grassy odour over time depends on treatment.          |
| Time (Row Factor)              | 2.440  | 4  | 0.6100 | F (3.282, 59.07) = 2.269 | P=0.0845 | No significant change in grassy odour intensity over time alone.    |
| Treatment (Column Factor)      | 0.2500 | 1  | 0.2500 | F (1, 18) = 0.2089       | P=0.6531 | No overall difference between fermented and unfermented samples.    |
| Subject (Panellist variation)  | 21.54  | 18 | 1.197  | F (18, 72) = 4.450       | P<0.0001 | Panellists varied significantly in how they rated the grassy odour. |

274 A two-way repeated measures ANOVA was used to assess the effects of fermentation  
 275 treatment, time, and their interaction on grassy odour intensity. A significant interaction  
 276 between time and treatment (p = 0.0188) indicates that the change in grassy odour perception  
 277 over time differed depending on fermentation condition. A significant subject effect indicates  
 278 variability among panellist ratings (P<0.0001). No significant main effects of time or treatment  
 279 were observed. Geisser-Greenhouse correction was applied to the time effect ( $\epsilon$  = 0.8204).  
 280 Note: *F* = F-ratio; DF = degrees of freedom; SS = sum of squares; MS = mean square.

281

282 **Table S9. Statistical summary of pairwise comparison for grassy odour intensity between**  
 283 **unfermented and *L. plantarum*-fermented microalgae.**

|                                        |                   |
|----------------------------------------|-------------------|
| <b>Difference between column means</b> |                   |
| Mean of Microalgae only                | 2.060             |
| Mean of <i>L. plantarum</i> _MA        | 1.960             |
| Difference between means               | 0.1000            |
| SE of difference                       | 0.2188            |
| 95% CI of difference                   | -0.3596 to 0.5596 |

284 Reported values include mean difference, standard error (SE), and 95% confidence interval  
285 (CI).

286

287 **Table S10. Two-way ANOVA statistics for sour odour intensity.**

| <b>ANOVA table</b>                | <b>SS</b> | <b>DF</b> | <b>MS</b> | <b>F (DFn, DFd)</b>      | <b>P value</b> | <b>Significance and Interpretation</b>                                            |
|-----------------------------------|-----------|-----------|-----------|--------------------------|----------------|-----------------------------------------------------------------------------------|
| Interaction<br>(Time × Treatment) | 1.840     | 4         | 0.4600    | F (4, 72) = 2.875        | P=0.0287       | The change in sour odour over time depends on treatment.                          |
| Time<br>(Row Factor)              | 1.840     | 4         | 0.4600    | F (2.301, 41.41) = 2.875 | P=0.0607       | No significant change in sour odour intensity over time alone.                    |
| Treatment<br>(Column Factor)      | 0.8100    | 1         | 0.8100    | F (1, 18) = 0.9480       | P=0.3431       | No overall difference in sour odour between the fermented and unfermented groups. |
| Subject<br>(Panellist variation)  | 15.38     | 18        | 0.8544    | F (18, 72) = 5.340       | P<0.0001       | Panellists varied significantly in how they rated sour odour.                     |

288 A two-way repeated measures ANOVA was used to assess the effects of fermentation  
 289 treatment, time, and their interaction on sour odour intensity. A significant interaction between  
 290 time and treatment ( $p = 0.0287$ ) indicates that the change in grassy odour perception over time  
 291 differed depending on fermentation condition. A significant subject effect indicates variability  
 292 among panellist ratings ( $P < 0.0001$ ). No significant main effects of time or treatment were  
 293 observed. Geisser-Greenhouse correction was applied to the time effect ( $\varepsilon = 0.5751$ ). Note:  $F$   
 294 = F-ratio; DF = degrees of freedom; SS = sum of squares; MS = mean square.

295

296 **Table S11. Statistical summary of pairwise comparison for sour odour intensity between**  
 297 **unfermented and *L. plantarum*-fermented microalgae.**

| Difference between column means |                   |
|---------------------------------|-------------------|
| Mean of Microalgae only         | 1.220             |
| Mean of <i>L. plantarum</i> _MA | 1.400             |
| Difference between means        | -0.1800           |
| SE of difference                | 0.1849            |
| 95% CI of difference            | -0.5684 to 0.2084 |

298 Reported values include mean difference, standard error (SE), and 95% confidence interval  
 299 (CI).

300

301 **Table S12. Two-way ANOVA statistics for fishy odour intensity.**

| ANOVA table                              | SS     | DF | MS      | F (DFn, DFd)              | P value  | Significance and Interpretation                                               |
|------------------------------------------|--------|----|---------|---------------------------|----------|-------------------------------------------------------------------------------|
| Interaction<br>(Time $\times$ Treatment) | 0.1000 | 4  | 0.02500 | F (4, 72) = 0.06329       | P=0.9925 | No difference in changes between fermented and unfermented samples over time. |
| Time<br>(Row)                            | 1.460  | 4  | 0.3650  | F (2.627, 47.29) = 0.9241 | P=0.4262 | No significant change in fishy odour intensity                                |

|                                    |       |    |       |                       |          |                                                                                                      |
|------------------------------------|-------|----|-------|-----------------------|----------|------------------------------------------------------------------------------------------------------|
| Factor)                            |       |    |       |                       |          | over time alone.                                                                                     |
| Treatment<br>(Column<br>Factor)    | 0.000 | 1  | 0.000 | F (1, 18) =<br>0.000  | P>0.9999 | No overall<br>difference in<br>fishy odour<br>between the<br>fermented and<br>unfermented<br>groups. |
| Subject<br>(Panelist<br>variation) | 24.96 | 18 | 1.387 | F (18, 72)<br>= 3.511 | P<0.0001 | Panellists varied<br>significantly in<br>how they rated<br>fishy odour.                              |

302 A two-way repeated measures ANOVA was used to assess the effects of fermentation  
303 treatment, time, and their interaction on fishy odour intensity. A significant subject effect  
304 indicates variability among panellist ratings ( $P<0.0001$ ). No significant main effects of  
305 interaction, time or treatment were observed. Geisser-Greenhouse correction was applied to the  
306 time effect ( $\epsilon = 0.6569$ ). Note:  $F$  = F-ratio; DF = degrees of freedom; SS = sum of squares; MS  
307 = mean square.

308

309 **Table S13. Statistical summary of pairwise comparison for fishy odour intensity between**  
310 **unfermented and *L. plantarum*-fermented microalgae.**

|                                        |        |
|----------------------------------------|--------|
| <b>Difference between column means</b> |        |
| Mean of Microalgae only                | 1.520  |
| Mean of <i>L. plantarum</i> _MA        | 1.520  |
| Difference between means               | 0.000  |
| SE of difference                       | 0.2355 |
| 95% CI of difference                   | 1.520  |

311 Reported values include mean difference, standard error (SE), and 95% confidence interval  
312 (CI).

313

314 **Table S14. Two-way ANOVA statistics for earthy odour intensity.**

| ANOVA table                    | SS     | DF | MS     | F (DFn, DFd)              | P value | Significance and Interpretation                                                     |
|--------------------------------|--------|----|--------|---------------------------|---------|-------------------------------------------------------------------------------------|
| Interaction (Time × Treatment) | 0.9400 | 4  | 0.2350 | F (4, 72) = 0.7719        | 0.9400  | No difference in changes between fermented and unfermented samples over time.       |
| Time (Row Factor)              | 1.140  | 4  | 0.2850 | F (3.299, 59.38) = 0.9361 | 1.140   | No significant change in earthy odour intensity over time alone.                    |
| Treatment (Column Factor)      | 0.3600 | 1  | 0.3600 | F (1, 18) = 0.1617        | 0.3600  | No overall difference in earthy odour between the fermented and unfermented groups. |
| Subject (Panellist variation)  | 40.08  | 18 | 2.227  | F (18, 72) = 7.314        | 40.08   | Panellists varied significantly in how they rated earthy odour.                     |

315 A two-way repeated measures ANOVA was used to assess the effects of fermentation  
316 treatment, time, and their interaction on earthy odour intensity. A significant subject effect  
317 indicates variability among panellist ratings ( $P < 0.0001$ ). No significant main effects of  
318 interaction, time or treatment were observed. Geisser-Greenhouse correction was applied to the  
319 time effect ( $\epsilon = 0.5470$ ). Note:  $F$  = F-ratio; DF = degrees of freedom; SS = sum of squares; MS  
320 = mean square.

321

322 **Table S15. Statistical summary of pairwise comparison for earthy odour intensity**  
323 **between unfermented and *L. plantarum*-fermented microalgae.**

|                                 |       |
|---------------------------------|-------|
| Difference between column means |       |
| Mean of Microalgae only         | 1.720 |

|                                 |                   |
|---------------------------------|-------------------|
| Mean of <i>L. plantarum</i> _MA | 1.600             |
| Difference between means        | 0.1200            |
| SE of difference                | 0.2984            |
| 95% CI of difference            | -0.5070 to 0.7470 |

324 Reported values include mean difference, standard error (SE), and 95% confidence interval  
325 (CI).

326

## 327 Supporting Figures

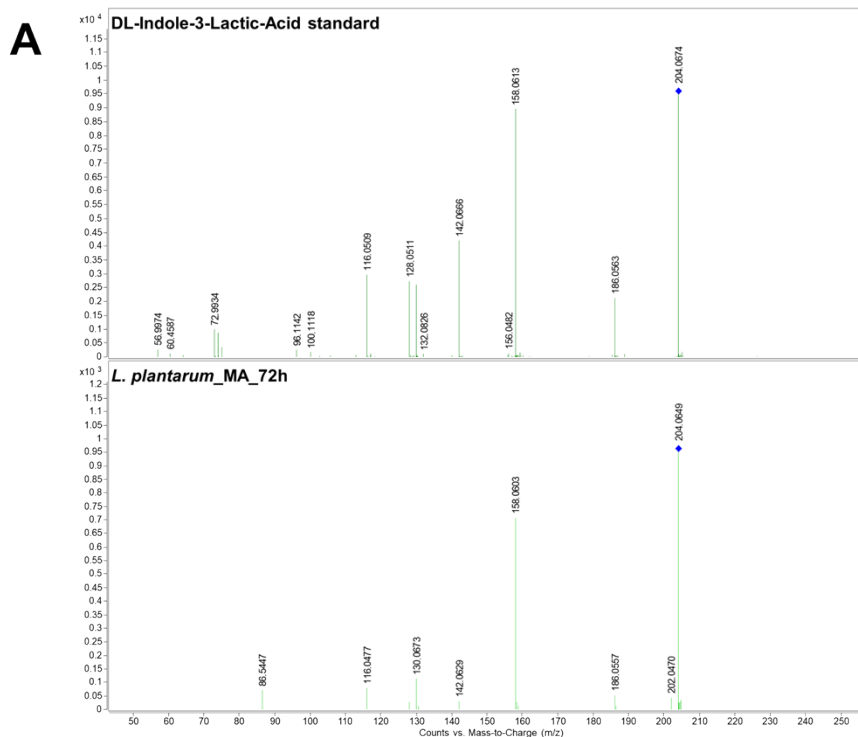

328

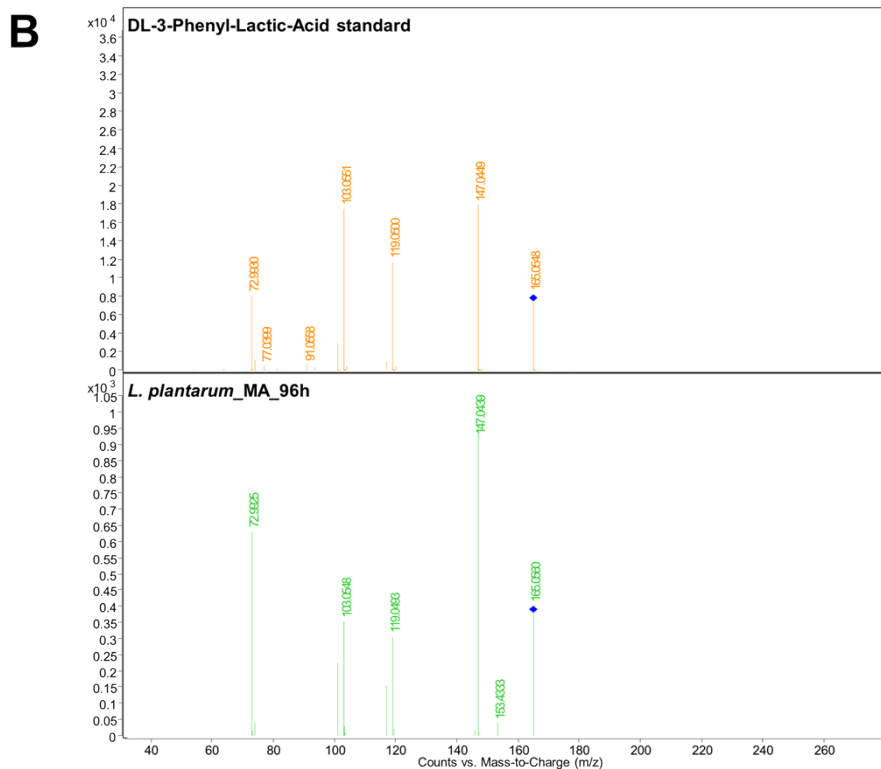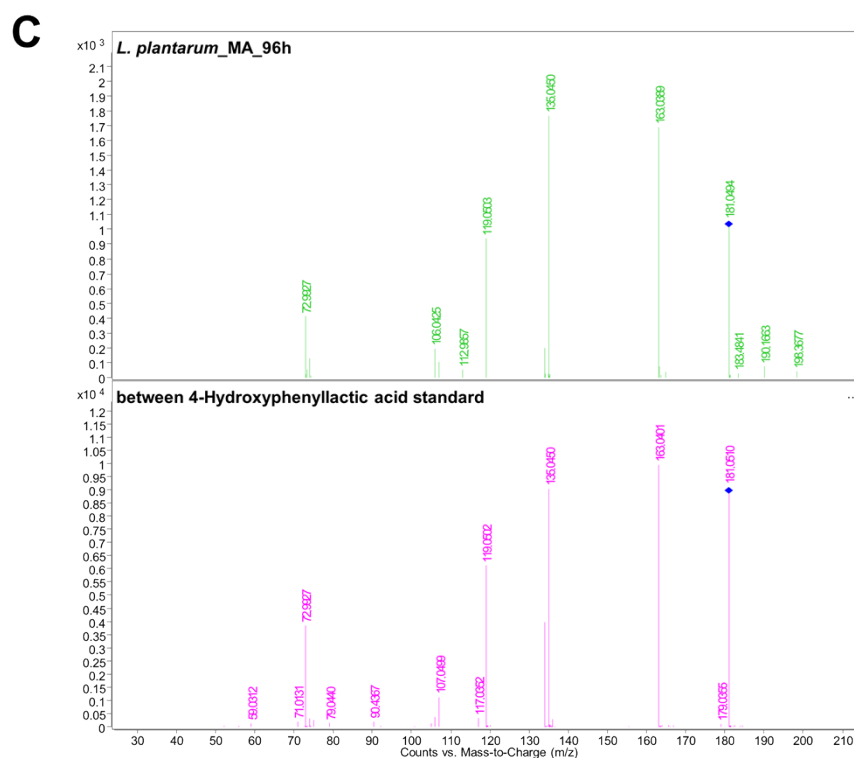

333 **Figure S1. LC-MS/MS fragmentation spectra at collision-induced dissociation (CID)10V**  
 334 **of aromatic lactic acid derivatives in *L. plantarum*-fermented microalgae. (A)** MS/MS  
 335 spectra of key fragment ions matched between DL-Indole-3-lactic acid reference standard and  
 336 *L. plantarum*-fermented microalgae at 72h of fermentation. **(B)** MS/MS spectra of key  
 337 fragment ions matched between DL-3-phenyllactic acid reference standard and *L. plantarum*-  
 338 fermented microalgae at 96 h of fermentation. **(C)** MS/MS spectra of key fragment ions  
 339 matched between 4-Hydroxyphenyllactic acid reference standard and *L. plantarum*-fermented  
 340 microalgae at 96h of fermentation.

341

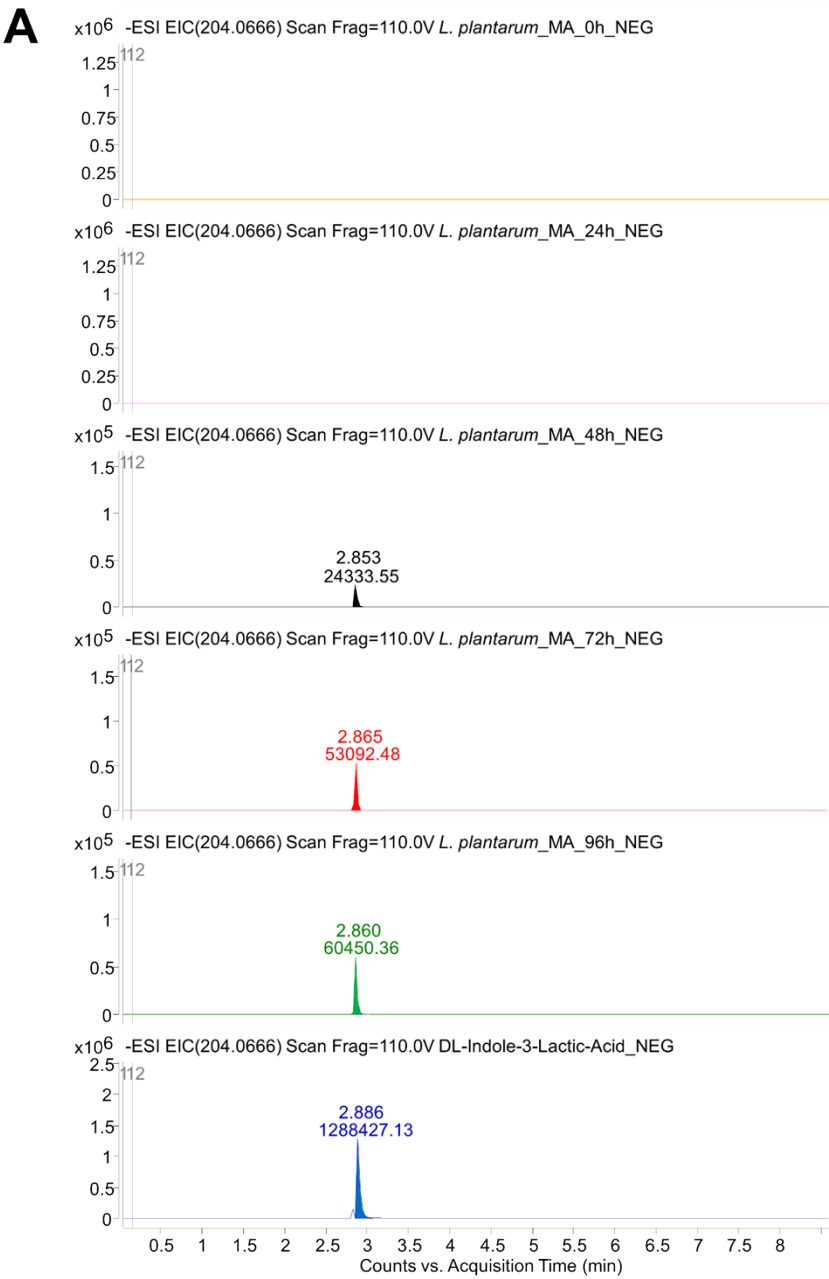

342

**B**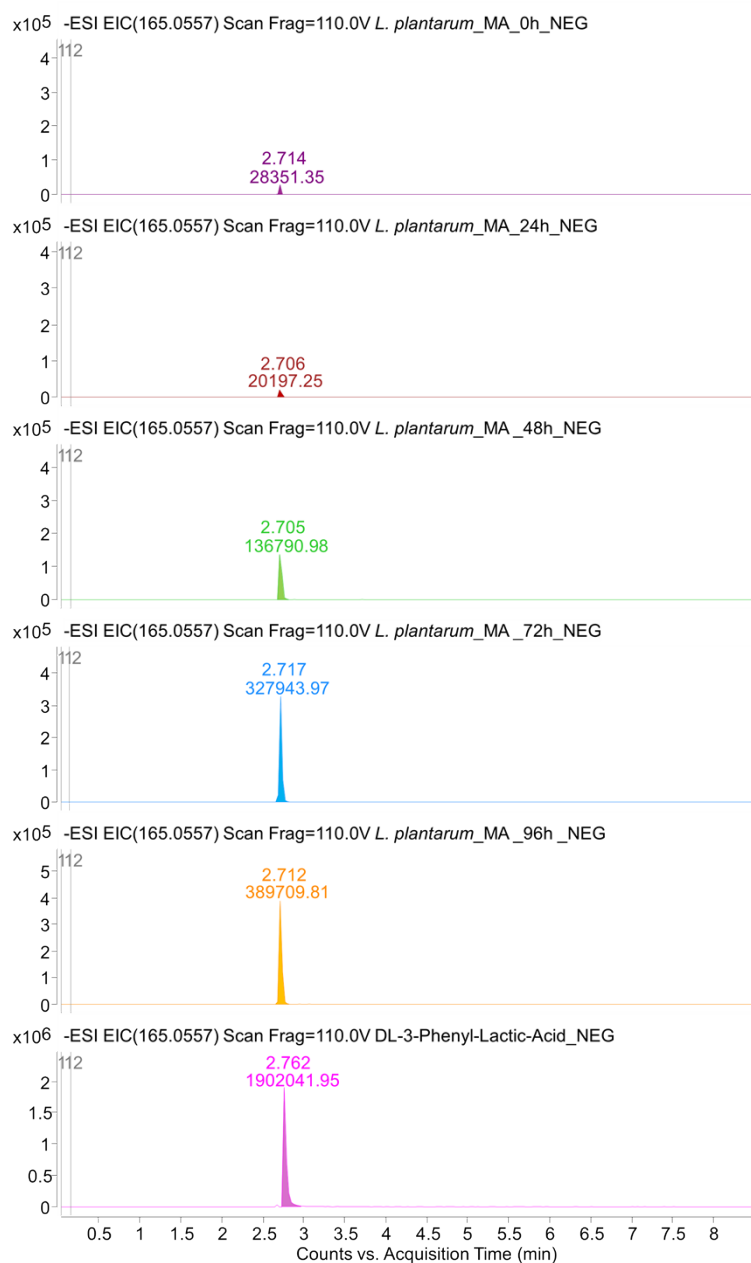

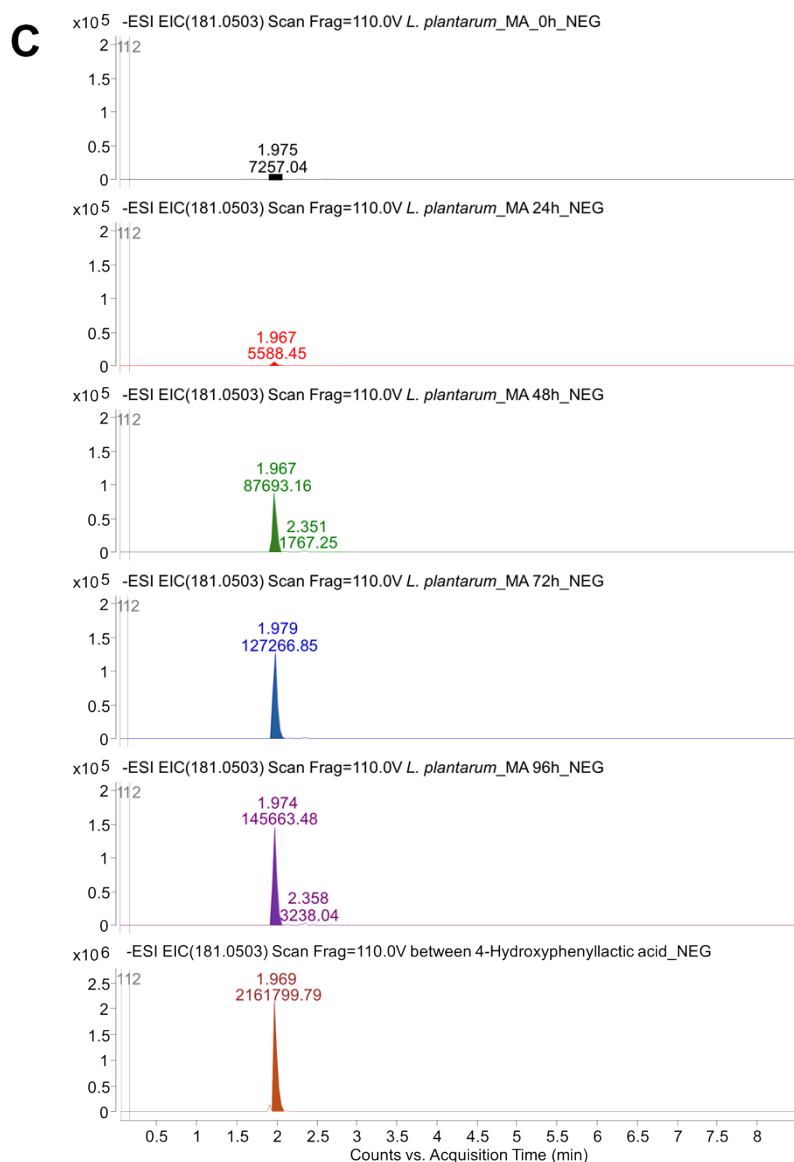

344

345

346 **Figure S2. Extracted ion chromatograms (EICs) from LC-MS showing the bioconversion**  
 347 **of precursor amino acids during *L. plantarum*-mediated fermentation of microalgae (MA)**  
 348 **over 96 hours. (A–C) LC-MS EICs showing the time-dependent increase in signal intensity**  
 349 **of (A) DL-indole-3-lactic acid (m/z 204.0666), (B) D-3-phenyllactic acid (m/z 165.0557), and**  
 350 **(C) 4-Hydroxyphenyllactic acid (m/z 181.0503), across fermentation time points (0h, 24h, 48h,**  
 351 **72h, 96h) compared to reference standards.**

352

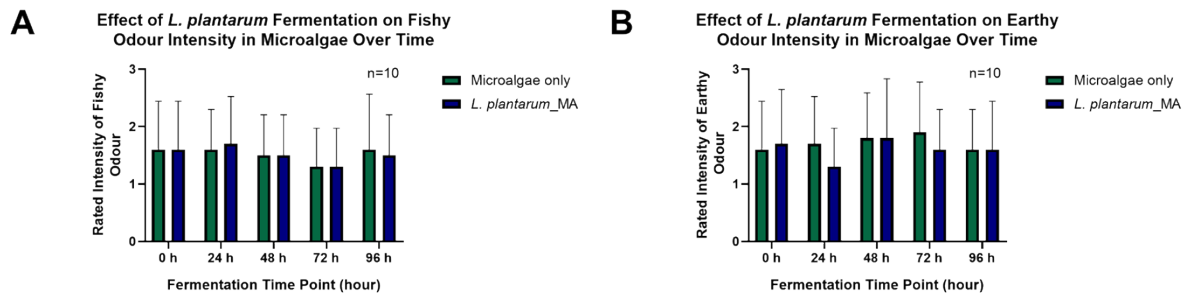

353

354 **Figure S3. Olfactory evaluation of microalgae fermented with *L. plantarum*. (A-B)**  
 355 Sensory intensities of (A) fishy and (B) earthy odour attributes in unfermented microalgae  
 356 (Microalgae only) and *L. plantarum*-fermented microalgae (*L. plantarum*\_MA) over 96 hours.  
 357 Olfactory evaluation was performed by an untrained in-house olfactory panel (n = 10), with  
 358 intensities ranked on a structured 3-point scale (1 = weak, 2 = moderate, 3 = strong). Bars  
 359 represent mean  $\pm$  standard deviation.

360

361

362

363

364

365

366

367

368

369

## 370 Supporting References

- 371 1 X. H. Chin, R. Soh, G. Chan, P. Ng, A. Thong, H. Elhalis, K. Yoganathan, Y. Chow and S.  
372 Q. Liu, *Current Research in Food Science*, 2025, **10**, 100933.
- 373 2 F. L. Sirota, F. Goh, K.-N. Low, L.-K. Yang, S. C. Crasta, B. Eisenhaber, F. Eisenhaber, Y.  
374 Kanagasundaram and S. B. Ng, *Journal of Genomics*, 2018, **6**, 63–73.
- 375 3 R. Schmid, S. Heuckeroth, A. Korf, A. Smirnov, O. Myers, T. S. Dyrland, R. Bushuiev, K.  
376 J. Murray, N. Hoffmann, M. Lu, A. Sarvepalli, Z. Zhang, M. Fleischauer, K. Dührkop, M.  
377 Wesner, S. J. Hoogstra, E. Rudt, O. Mokshyna, C. Brungs, K. Ponomarov, L. Mutabdzija, T.  
378 Damiani, C. J. Pudney, M. Earll, P. O. Helmer, T. R. Fallon, T. Schulze, A. Rivas-Ubach, A.  
379 Bilbao, H. Richter, L.-F. Nothias, M. Wang, M. Orešič, J.-K. Weng, S. Böcker, A. Jeibmann,  
380 H. Hayen, U. Karst, P. C. Dorrestein, D. Petras, X. Du and T. Pluskal, *Nature Biotechnology*,  
381 2023, **41**, 447–449.
- 382 4 Z. Pang, Y. Lu, G. Zhou, F. Hui, L. Xu, C. Viau, A. F. Spigelman, P. E. MacDonald, D. S.  
383 Wishart, S. Li and J. Xia, *Nucleic Acids Research*, 2024, **52**, 398–406.
- 384 5 B. Zhou, X. Zhao, L. Laghi, X. Jiang, J. Tang, X. Du, C. Zhu and G. Picone, *Foods*, 2024,  
385 **13**, 2911.
- 386 6 L. Wang, J. Xie, Q. Wang, J. Hu, Y. Jiang, J. Wang, H. Tong, H. Yuan and Y. Yang, *Food*  
387 *Chemistry: X*, 2024, **23**, 101519.
- 388 7 M. Gil, M. Rudy, P. Duma-Kocan and R. Stanisławczyk, *Applied Sciences*, 2025, **15**, 1530.
- 389 8 M. S. Moazzem, M. Hayden, D.-J. Kim and S. Cho, *Foods*, 2024, **13**, 3269.
- 390 9 N. Muenprasitvej, Electronic Tongue Analysis of Major and Minor Steviol Glycosides and  
391 Their Application in Foods, <https://etd.auburn.edu/handle/10415/8305>.
- 392 10 R. I. Potter, J. Lee and C. F. Ross, *Food science & nutrition*, 2025, **13**, e70366.
- 393 11 T. Wang, L. Yang, Y. Xiong, B. Wu, Y. Liu, M. Qiao, C. Zhu, H. Wu, J. Deng and J.  
394 Guan, *Frontiers in Nutrition*, 2024, **11**, 1435364.
- 395 12 X. Cai, Y. Zeng, K. Zhu, Y. Peng, P. Xv, P. Dong, M. Qiao and W. Fan, *Foods*, 2025, **14**,  
396 1982.
- 397 13 X. Yin, Y. Lv, R. Wen, Y. Wang, Q. Chen and B. Kong, *Meat Science*, 2021, **172**,  
398 108345.
